# Supplementary material for: SMARCA4 regulates gene expression and higher-order chromatin structure in proliferating mammary epithelial cells
Source: HighWire-hosted journal article supplement (doi:10.1101/gr.201624.115), 2016-07-19
Supplement: Supplemental_Table_S1.xlsx [file Supplemental_Table_S1.xlsx]

## Sheet: Sheet1
GeneSymbol	accession	shSMARCA4 /shSCRAM log2FoldChange	padj
CFH	uc001gti.4,uc001gtj.4,uc009wyw.3,uc009wyx.3	-3.74692	2.47e-47
DKFZp686D16130	uc021tkj.1	-3.72627	8.89e-20
KIF26A	uc001yos.4	-3.71859	4.3e-67
IL33	uc003zjt.3,uc011lmg.2,uc011lmh.2,uc022bdf.1	-3.40549	2.38e-32
POSTN	uc001uwo.4,uc001uwp.4,uc001uwq.3,uc001uwr.3,uc010tet.2,uc010teu.1,uc010tev.1,uc010tew.1,uc010tex.1	-3.31515	2.25e-84
FBLN2	uc011auz.2,uc011ava.2,uc011avb.2,uc011avc.2	-3.31057	3.16e-16
ZEB1	uc001ivr.4,uc001ivs.4,uc001ivt.4,uc001ivu.4,uc001ivv.4,uc009xlh.1,uc009xli.1,uc009xlj.1,uc009xlk.1,uc009xll.2,uc009xlm.1,uc009xln.1,uc009xlo.2,uc009xlp.3,uc010qef.2,uc010qeg.1,uc010qeh.2	-3.28587	1.04e-35
CLGN	uc003iii.3,uc011chi.2	-3.28123	3.33e-22
AKAP12	uc003qoe.3,uc003qof.3,uc003qog.3,uc010kim.3,uc011eep.2	-3.2371	1.18e-37
VCAN	uc003kih.4,uc003kii.3,uc003kij.3,uc003kik.3,uc003kil.3,uc010jau.2	-3.20819	2.57e-275
NEGR1	uc001dfv.3,uc001dfw.3,uc010oqs.2	-3.04639	8.95e-39
SEMA3D	uc003uib.3,uc003uic.3,uc010led.3,uc010lee.1	-3.02301	4e-14
IL1RL1	uc002tbu.1,uc002tbv.3,uc010ywa.2	-3.00902	3.2e-22
AJ515158	uc021ydd.1	-2.97215	9.63e-12
MUC5AC	uc001lsz.3,uc009ycs.2	-2.93295	3.42e-25
PTX3	uc003fbl.4	-2.92545	1.19e-15
LOC151760	uc003dxs.1	-2.89306	1.17e-16
HAS2	uc003yph.2	-2.8337	1.84e-138
NEXN	uc001dia.3,uc001dib.4,uc001dic.4,uc001did.1,uc001dif.1,uc001dig.4,uc009wcb.1	-2.82858	1.31e-31
CRISPLD1	uc003yan.3,uc011lfk.2,uc011lfl.2	-2.81544	4.77e-12
DCN	uc001tbo.3,uc001tbp.3,uc001tbq.3,uc001tbr.3,uc001tbt.3,uc001tbu.3	-2.76099	1.1e-40
PTPN22	uc001eds.3,uc001edt.3,uc001edu.2,uc009wgq.3,uc009wgr.2,uc009wgs.2,uc010owo.2,uc021orx.1,uc021ory.1	-2.75211	2.75e-18
IL1A	uc002tig.3	-2.74786	1.11e-34
CTGF	uc003qcz.3	-2.74243	2.64e-83
SHISA2	uc001uqm.1	-2.73379	3.15e-20
LRRK2	uc001rmg.4,uc001rmh.1,uc001rmi.3,uc009zjw.3	-2.72867	1.57e-21
IFI44	uc001dip.4,uc010orr.1,uc010ors.1	-2.7273	4.09e-34
ADAMTS6	uc003jtp.3,uc003jtq.3,uc003jtr.1	-2.71985	7.12e-34
SYCP2	uc002yaz.3,uc010gju.1	-2.71296	7.01e-15
FAM196B	uc003mag.2	-2.67832	8.34e-27
SULF1	uc003xyd.2,uc003xye.2,uc003xyf.2,uc003xyg.2,uc003xyh.1,uc003xyi.1,uc003xyj.1,uc010lza.1	-2.66752	3.31e-11
MMP16	uc003yeb.4	-2.63941	2.53e-23
VEPH1	uc003fbj.2,uc003fbk.2,uc003fbm.3,uc003fbn.3,uc010hvu.2,uc021xgk.1	-2.6384	2.75e-35
CCDC68	uc002lfs.3,uc002lft.3	-2.63218	4.06e-47
BDNF	uc001mrt.3,uc001mru.3,uc001mrv.3,uc001mrw.4,uc001mrx.3,uc001mry.4,uc001mrz.4,uc001msa.3,uc009yjd.3,uc009yje.3,uc009yjf.3,uc009yjg.3,uc010rdu.2,uc010rdw.2,uc010rdx.2,uc010rdy.2,uc021qff.1	-2.63125	6.78e-11
SLC7A2	uc011kyc.2,uc011kyd.2,uc011kye.2	-2.61605	1.25e-64
FPR3	uc002pxt.1,uc021uyq.1	-2.61186	4.1e-15
ZPLD1	uc003dvs.1,uc003dvt.1,uc011bhg.1	-2.60448	2.2e-15
SEPP1	uc003jna.3,uc011cps.2,uc011cpt.2,uc011cpu.2	-2.59516	2.31e-36
IFI44L	uc010oro.2,uc010orp.2,uc010orq.2	-2.58876	2.97e-20
KITLG	uc001tav.3,uc001taw.3,uc009zsn.3,uc009zso.1	-2.55155	2.02e-65
ABCA8	uc002jhp.3,uc002jhq.3,uc002jhr.3,uc002jhs.3,uc002jht.3,uc010wqq.2,uc010wqr.2	-2.54705	8.13e-12
SPOCD1	uc001bts.1,uc001btu.3,uc001btv.3,uc001btw.1,uc021oks.1	-2.52115	1.49e-25
TMPRSS11E	uc003hdz.4	-2.50782	7.5e-15
BC069257	uc001btr.1	-2.50333	5.08e-17
PADI4	uc001baj.2,uc009vpc.2	-2.48555	2.3e-23
CDH2	uc002kwg.2,uc010xbn.1	-2.45929	1.15e-57
GLIPR1	uc001sxs.3,uc009zsb.1	-2.44593	1.2e-29
SALL1	uc010cbv.3,uc021tid.1,uc021tie.1,uc021tif.1	-2.42414	9.75e-09
SAMD9L	uc003umh.1,uc003umi.1,uc003umj.1,uc003umk.1,uc010lfb.1,uc010lfc.1,uc010lfd.1,uc022ahh.1	-2.42278	8.91e-13
NAV3	uc001syo.3,uc001syp.3,uc009zsf.3,uc010sub.2	-2.41498	1.34e-23
MYLK	uc003egl.3,uc003egm.3,uc003ego.3,uc003egp.3,uc003egq.3,uc003egr.3,uc003egs.3,uc003egt.3,uc003egu.1,uc010hrr.3,uc010hrs.1,uc011bjv.2,uc011bjw.2	-2.39436	1.01e-28
CIR1	uc002uim.3,uc002uin.3	-2.375	1.29e-29
LOC152742	uc003gnb.3,uc003gnc.3,uc010idt.2	-2.36358	7.61e-13
MYEF2	uc001zwg.4,uc001zwh.4,uc001zwi.4,uc001zwj.4,uc001zwl.3	-2.35419	1.13e-24
RORA	uc002agt.4,uc002agv.3,uc002agw.3,uc002agx.3,uc021sni.1	-2.35353	5.16e-08
DOCK10	uc002voa.2,uc002vob.2,uc002voc.2,uc002vod.1,uc010fwz.1	-2.33823	2.36e-46
KCNJ15	uc021wjc.1	-2.33601	1.82e-26
IL8	uc003hhe.3	-2.31302	3.67e-15
NETO1	uc002lkw.3,uc002lky.2,uc002lkz.3	-2.30191	8.8e-09
CEP290	uc001taq.3,uc001tar.3,uc001tat.3,uc009zsl.1	-2.29994	2.37e-12
EPHA5	uc003hcx.3,uc003hcy.3,uc003hcz.3,uc003hda.2,uc011cah.2,uc011cai.2	-2.28477	3.75e-08
PCDH7	uc003gsk.1,uc011bxx.2,uc021xnc.1,uc021xnd.1	-2.27248	4.48e-71
AK126334	uc003pby.1	-2.26815	1.11e-07
MAP1B	uc003kbw.4,uc010iyw.1,uc010iyx.1,uc010iyy.1	-2.26614	6.32e-30
SRGN	uc001joz.3,uc021prx.1	-2.26062	4.77e-31
TRIQK	uc003yfk.4,uc003yfn.4,uc003yfq.4,uc003yfr.4,uc003yfs.2,uc010map.3,uc022axy.1,uc022axz.1,uc022aya.1	-2.24507	1.55e-11
PROS1	uc003dqz.4,uc003drb.4,uc010hoo.3	-2.22849	8.76e-48
NRG1	uc003xip.3,uc003xir.3,uc003xis.3,uc003xit.2,uc003xiu.2,uc003xiv.2,uc003xiw.2,uc003xix.3,uc003xiy.3,uc003xiz.1,uc003xja.2,uc010lvl.3,uc010lvm.3,uc010lvn.3,uc010lvo.2,uc010lvp.2,uc010lvq.2,uc010lvr.2,uc010lvs.2,uc011lbf.1,uc011lbg.1,uc011lbh.1,uc022ats.1	-2.22174	1.83e-11
NID2	uc001wzo.3,uc001wzp.3,uc010tqs.2,uc010tqt.1	-2.21069	3.9e-64
DYNC2H1	uc001phn.1,uc001pho.2,uc009yxe.1	-2.2059	3.66e-35
ZNF567	uc002oeo.1,uc002oep.4,uc002oeq.1,uc010xtk.1,uc010xtl.2	-2.20568	8.06e-17
MCF2	uc004fau.3,uc004fav.3,uc004faw.2,uc010nsh.2,uc011mwl.2,uc011mwm.2,uc011mwn.1,uc011mwo.1	-2.20527	2.25e-25
FN1	uc002vez.3,uc002vfa.3,uc002vfb.3,uc002vfc.3,uc002vfe.3,uc002vff.3,uc002vfg.3,uc002vfh.3,uc002vfi.3,uc002vfj.3,uc002vfk.1,uc002vfl.3,uc010fva.1,uc010fvb.1,uc010fvc.1,uc010fvd.1,uc010zjp.2	-2.20308	9.27e-26
SLC7A11	uc021xrw.1	-2.19446	1.14e-14
CD36	uc003uhc.3,uc003uhd.4,uc003uhe.4,uc003uhf.4,uc003uhg.4,uc003uhh.4,uc011kgv.2,uc022agu.1,uc022agv.1	-2.19247	9.72e-36
MAP9	uc003ios.3,uc003iot.1,uc010iqa.1,uc010iqb.2,uc011cin.2	-2.18763	5.93e-34
UNC5D	uc003xjr.2,uc003xjs.2,uc003xjt.1,uc003xju.2	-2.1876	4.06e-07
PRR16	uc003ksp.3,uc003ksq.3,uc003ksr.3	-2.18421	1.45e-20
WISP1	uc003yub.3,uc003yuc.3,uc003yud.3,uc010meb.3,uc010mec.3,uc010med.3	-2.17323	8.93e-09
TDRD9	uc001yom.4,uc001yon.4	-2.1699	5.6e-08
SAMD9	uc003umf.3,uc003umg.3,uc022ahg.1	-2.16641	3.32e-14
ZNF84	uc001ulm.4,uc009zyy.3,uc009zyz.3,uc009zza.3	-2.16594	2.42e-25
PTGFR	uc001dim.3,uc001din.3	-2.16399	7.32e-22
FAP	uc002ucd.3,uc010fpc.3,uc010fpe.1,uc010zct.2	-2.15894	5.79e-41
MYO15B	uc002jom.1,uc002jon.1,uc002joo.1,uc002jor.1,uc002jos.4,uc010dgh.3,uc010dgi.1,uc010dgj.1,uc010wse.2	-2.15403	1.35e-15
CCL20	uc002vpl.2,uc002vpm.2	-2.15161	2.81e-26
SLC1A1	uc003zij.2	-2.14759	8.27e-32
BTC	uc003hig.2	-2.14193	4.84e-08
BC127823	uc003avi.1	-2.1404	2.6e-06
ZNF117	uc003ttr.2	-2.13614	8.34e-27
TTLL7	uc001djb.3,uc001djc.3,uc001djd.3,uc001dje.3,uc001djf.3,uc001djg.3	-2.13322	4.64e-11
RND3	uc002txe.3,uc002txg.3,uc010zbv.2	-2.13025	1.86e-24
RASSF8	uc001rgw.2,uc001rgx.3,uc001rgy.3,uc001rgz.3,uc009zjd.2,uc009zje.2	-2.12765	4.55e-42
CXCR7	uc002vwd.3,uc010fyq.3,uc021vys.1	-2.12414	3.91e-16
CP	uc003eww.4,uc003ewx.4,uc003ewy.4,uc003ewz.3,uc010hvf.1	-2.12175	8.08e-17
HAS2-AS1	uc022baf.1	-2.11983	1.43e-08
KIAA1009	uc003pki.4,uc003pkj.4,uc003pkk.2,uc010kbp.3	-2.11699	2.05e-16
SMARCA1	uc004eun.4,uc004eup.4,uc011muk.1,uc011mul.1	-2.10967	6.71e-29
ABI3BP	uc003duj.3,uc003duk.3,uc003dul.3,uc003dum.3,uc003dun.3,uc003duo.2,uc003dup.4,uc011bhd.2	-2.10772	2.97e-51
AK092150	uc002nrs.1	-2.10765	2.57e-06
SYT1	uc001sys.3,uc001syt.3,uc001syu.3,uc001syv.3	-2.10476	1.05e-08
SOX5	uc001rfw.3,uc001rfz.1,uc001rga.3,uc010siw.1	-2.10461	2.77e-11
PAPPA	uc004bjn.3,uc011lxp.1,uc011lxq.2	-2.09935	2.83e-113
ANGPT1	uc003ymn.3,uc003ymo.3,uc003ymp.4,uc011lhv.2	-2.09296	8.91e-21
NBEA	uc001uvd.3,uc010abi.3,uc010tee.1,uc010tef.2,uc010teg.1,uc021ric.1,uc021rid.1	-2.08966	2.39e-08
APCDD1L-AS1	uc002xzf.1,uc002xzg.2	-2.08386	3.17e-50
TFPI	uc002upy.3,uc002uqa.2,uc002uqb.2	-2.07912	8.44e-22
WBP5	uc004ekd.3,uc004eke.3,uc004ekf.3,uc004ekg.3,uc022cbr.1	-2.07095	4.94e-38
BC126153	uc021vlg.1	-2.0638	2.47e-09
CCPG1	uc002acu.2,uc002acv.2,uc002acw.2,uc002acx.3,uc002acz.2,uc010bfk.2,uc021smu.1	-2.05849	9.03e-25
AKAP9	uc003uld.4,uc003ule.2,uc003ulf.3,uc003ulg.3,uc003uli.3,uc003ulj.3,uc003ulk.3,uc003ull.3	-2.05705	4.1e-16
LRRCC1	uc003ycw.3,uc003ycy.3,uc010lzz.2,uc010maa.2,uc022awx.1	-2.05348	1.46e-36
ZNF654	uc003dqv.3	-2.04022	2.3e-43
MSRB3	uc001ssm.3,uc001ssn.3,uc009zqp.3,uc021qzy.1	-2.0393	3.55e-27
CCDC112	uc003kqy.2,uc003kqz.2,uc003kra.2	-2.0319	1.17e-20
IL6ST	uc003jqp.3,uc003jqq.3,uc003jqr.3,uc010iwb.3,uc010iwd.3,uc010iwe.1,uc010iwf.1,uc011cqk.2	-2.03133	7.33e-16
LOC100505812	uc002pik.3	-2.0266	3.61e-14
SPOCK1	uc003lbo.3,uc003lbp.3	-2.01666	9.43e-113
CEP85L	uc003pxz.2,uc003pya.2,uc003pyb.3,uc003pyc.3,uc011ebj.2,uc011ebl.1	-2.01599	2.43e-16
LPAR1	uc004bfa.3,uc004bfb.3,uc004bfc.3,uc010mub.3,uc011lwm.2,uc011lwn.2,uc011lwo.2	-2.01449	3.65e-16
DFNA5	uc003sxa.1,uc010kus.1,uc010kut.1	-2.01425	5.5e-14
AK021804	uc001pye.1	-2.00924	2.59e-13
QPCT	uc002rqg.3	-2.00178	1.89e-29
FW340024	uc021xph.1	-2.00094	8.46e-22
ITGA4	uc002unu.3,uc002unv.3,uc010frj.1,uc010zfl.1	-1.99923	6.82e-09
ATRX	uc004eco.4,uc004ecp.4,uc004ecq.4,uc004ecr.2,uc010nlx.1,uc010nly.1	-1.99407	4.33e-21
CEP112	uc002jfk.3,uc002jfl.3,uc002jfm.3,uc010deo.3,uc010dep.2	-1.99114	2.15e-12
PNMA2	uc003xez.2,uc022atc.1	-1.991	5.78e-08
CNR1	uc003pmq.4,uc010kbz.3,uc010kca.3,uc011dzr.2,uc011dzs.2,uc011dzt.2,uc021zco.1	-1.98824	9.93e-06
F2RL2	uc011csw.2	-1.98676	7.31e-11
C6orf170	uc003pyo.1,uc003pyp.1,uc003pyq.1,uc010kej.1	-1.983	7.87e-10
ZFP112	uc002ozc.4,uc010ejj.3,uc010xwy.2,uc010xwz.2	-1.98005	1.52e-22
CCDC82	uc001pfx.4,uc009ywp.3,uc009ywr.3,uc009yws.3	-1.97977	2.5e-24
HIF1A	uc001xfq.2,uc001xfr.2,uc001xfs.2,uc010tsc.1,uc021rua.1,uc021rub.1	-1.97876	7.04e-36
CYR61	uc001dle.3	-1.97425	5.45e-71
DCLK1	uc001uve.4,uc001uvf.3,uc001uvh.4,uc010abk.3,uc010teh.2	-1.97241	6.21e-08
RAB40A	uc004ekk.3,uc022cbs.1	-1.96084	1.87e-05
PPARGC1A	uc003gqs.3,uc003gqt.3,uc003gqu.4,uc010ier.1,uc011bxp.1	-1.954	4e-08
PRKG1	uc001jjm.3,uc001jjn.2,uc001jjo.3,uc009xow.2,uc010qhp.2	-1.95359	1.19e-05
EVI2B	uc002hgk.2,uc010csq.2,uc021tuk.1	-1.9519	3.73e-07
SCEL	uc001vki.3,uc001vkj.3,uc010thx.2	-1.94981	4.65e-11
FAT4	uc003ifi.1,uc003ifj.4,uc011cgp.2	-1.94113	1.01e-49
CHST2	uc003evm.3,uc021xex.1	-1.94092	1.11e-05
CLEC2B	uc001qwn.3	-1.93998	2e-09
UCN2	uc003cty.1,uc021wxo.1	-1.93737	4.32e-09
GOLGB1	uc011bjm.1	-1.9343	3.85e-37
CYP4Z1	uc001cqu.1	-1.93175	1.6e-13
UPB1	uc003aae.3,uc003aaf.3,uc021wnh.1	-1.92703	2.64e-05
MANEA	uc003pon.3,uc003poo.2	-1.92045	3.16e-25
PDCD1LG2	uc003zjg.4,uc010mho.1,uc010mhp.1,uc011lmc.2,uc011lmd.2	-1.918	1.61e-06
ANKRD1	uc001khe.1	-1.9167	2.22e-05
PVRL3	uc003dxt.2,uc003dxu.2,uc021xch.1	-1.91655	4.02e-27
ZDHHC21	uc003zlg.2,uc003zlh.2	-1.91364	6.18e-30
LGALS9C	uc002gtw.3,uc010vyb.2	-1.91157	2.17e-05
GNG11	uc003und.3	-1.91148	1.08e-20
4-Mar	uc002vgb.3	-1.90949	3.97e-06
RYR2	uc001hyl.1,uc010pxz.1,uc010pya.2,uc010pyb.1,uc021pkx.1,uc021pky.1,uc021pkz.1	-1.90106	6.41e-11
LOC100507632	uc003xtc.2	-1.89752	8.43e-07
BC010924	uc001odz.3	-1.8943	4.98e-40
PLA2R1	uc002ube.2,uc002ubf.3,uc010zcp.2	-1.89299	8.85e-42
FMN2	uc001hyr.3,uc010pyd.2,uc010pye.2,uc010pyf.1,uc010pyg.2	-1.88965	9.2e-06
WDR52	uc003ead.2,uc003eae.2,uc010hqj.2,uc010hqk.2	-1.88926	1.37e-11
PCDH9	uc001vik.3,uc001vil.3,uc001vin.3,uc010aei.3,uc010thl.2	-1.88635	5.33e-42
KIAA1462	uc001iux.3,uc001iuy.3,uc001iuz.3,uc009xle.2	-1.88618	6.85e-07
NPY1R	uc003iqm.2,uc011cjj.2	-1.8832	1.21e-18
CMKLR1	uc001tmv.3,uc001tmw.3,uc009zuv.3,uc009zuw.3,uc021rdj.1	-1.8828	3.65e-12
NAALADL2	uc003fiq.1,uc003fir.3,uc003fis.3,uc003fit.3,uc003fiu.1,uc010hwx.2,uc010hwz.1	-1.88008	1.75e-06
PMP22	uc002goj.3,uc002gok.3,uc002gol.3	-1.87113	1.51e-16
DHRS9	uc002uep.3,uc002ueq.3,uc002uer.1,uc010zdc.2,uc010zdd.2,uc010zde.2	-1.87108	6.8e-14
PRKG2	uc003hmh.2,uc011ccf.1,uc011ccg.1,uc011cch.1	-1.87083	1.38e-05
AK124680	uc003lzd.1	-1.86174	1.58e-07
PTGER2	uc001wzr.3	-1.85637	4.09e-10
LIFR	uc003jli.2,uc010ive.1	-1.85482	4.19e-21
ATP2B1	uc001tbf.3,uc001tbg.3,uc001tbh.3,uc009zsr.3	-1.8538	9.5e-38
CDH11	uc002eoi.3,uc002eoj.3,uc010cdn.3,uc010vin.2,uc010vio.1	-1.84775	2.95e-06
DCUN1D1	uc003fld.1	-1.84658	1.1e-23
MTMR7	uc003wxm.3,uc003wxn.3,uc011kya.2,uc011kyb.2	-1.84408	5e-09
AQP9	uc002aez.2,uc010ugx.1	-1.84177	3.08e-06
TMEM158	uc011baf.2	-1.8404	1.21e-05
IL1B	uc002tih.1,uc002tii.1	-1.83964	1.44e-06
HSD17B2	uc002fgv.3	-1.83754	4.03e-06
TNIK	uc003fhg.2,uc003fhh.2,uc003fhi.2,uc003fhj.2,uc003fhk.2,uc003fhl.2,uc003fhm.2,uc003fhn.2,uc003fho.2,uc003fhp.3,uc003fhq.3	-1.83621	3.25e-10
NRCAM	uc003vez.3,uc003vfa.3,uc003vfc.3,uc003vfd.3,uc003vfe.3,uc011kmj.2,uc011kmk.2,uc022aka.1	-1.83029	1.66e-09
FRMPD4	uc004cuz.2,uc011mij.2	-1.82626	1.88e-05
BC033061	uc021zdc.1	-1.82353	1.07e-21
FBN1	uc001zwx.2,uc010beo.2	-1.82342	1.01e-52
ENPP1	uc003qcy.3,uc011ecf.2	-1.81764	1e-10
CYP1B1	uc002rqo.2	-1.81728	3.72e-22
ZNF10	uc001ulq.3,uc009zzb.3	-1.81543	4.43e-24
POF1B	uc004eer.2,uc004ees.3	-1.81304	4.72e-11
HNMT	uc002tvd.3,uc002tve.3,uc002tvf.3	-1.81088	1.76e-05
GALNT15	uc003caq.4,uc003car.4,uc003cas.4	-1.80853	1.62e-23
ETAA1	uc002sdz.1	-1.8062	1.39e-24
ATP10B	uc003lym.1,uc003lyn.3,uc003lyo.2,uc003lyp.2,uc010jit.1,uc011deg.1	-1.80452	2.54e-13
CENPE	uc003hxb.1,uc003hxc.1,uc003hxd.1	-1.80363	2.33e-08
ABCC4	uc001vmd.4,uc001vme.2,uc001vmf.2,uc010afj.3,uc010afk.3,uc010afl.1,uc010afm.1,uc010tih.1	-1.80007	1.24e-18
PLOD2	uc003evq.1,uc003evr.1,uc003evs.1,uc011bnm.1	-1.79653	1.75e-27
CCDC14	uc003egv.4,uc003egx.4,uc003egy.4,uc003egz.2,uc010hrt.3,uc011bjx.2	-1.79605	4.67e-14
PAG1	uc003ybz.3	-1.79492	1.44e-16
ZNF804A	uc002uph.3	-1.78148	0.000103516
IGFBP7	uc003hcn.3,uc011cag.2	-1.78094	1.21e-23
CASP8AP2	uc003pnr.3,uc003pns.2,uc003pnt.3,uc011dzz.2	-1.77661	4.32e-20
SERPINE2	uc002vnu.2,uc002vnv.2,uc010zlr.1	-1.77345	4.74e-229
PLXNC1	uc001tdc.3,uc009zsv.3,uc010sut.2	-1.77274	1.98e-05
DOCK11	uc004eqp.2,uc004eqq.2	-1.77087	9.43e-16
PKIA	uc003yba.3,uc003ybb.3,uc010lzo.3	-1.7697	1.65e-10
PLEKHH2	uc002rte.3,uc002rtf.3,uc010yny.2	-1.76864	1.1e-07
DISC1	uc001hux.1,uc001huy.3,uc001huz.3,uc001hva.3,uc001hvc.3,uc009xfr.3,uc010pwm.2,uc010pwn.1,uc010pwo.2,uc010pwp.2,uc010pwq.2,uc010pwr.1,uc010pws.1,uc010pwt.1,uc010pwu.1,uc010pwv.2,uc010pww.2,uc010pwx.2,uc010pwy.2,uc010pwz.2,uc010pxa.2,uc010pxb.1,uc010pxc.1,uc010pxd.2,uc010pxe.2,uc010pxf.2,uc010pxg.2,uc010pxh.2,uc010pxi.1,uc010pxj.1,uc010pxk.1,uc010pxl.1,uc010pxm.2,uc010pxn.1,uc021pkn.1	-1.76715	7.63e-07
NMUR2	uc003luv.2	-1.75328	0.000112653
ZNF420	uc002ofl.3	-1.75268	1.86e-07
MPDZ	uc003zkx.4,uc003zky.4,uc003zkz.4,uc003zlb.4,uc010mhx.3,uc010mia.1,uc010mib.3,uc011lmm.2	-1.75045	1.25e-29
TAGLN	uc001pql.1,uc001pqm.3,uc001pqn.3,uc001pqo.3,uc001pqp.3	-1.75032	4.21e-42
CDH10	uc003jgr.2,uc011cnu.2	-1.74543	8.31e-05
NOV	uc003yoq.2	-1.74319	0.000151205
VWDE	uc003ssj.2,uc011jxl.1,uc011jxm.1	-1.74212	4.69e-09
SYTL2	uc001pav.3,uc001paw.3,uc001pax.3,uc001pay.3,uc001paz.3,uc001pbb.3,uc001pbc.3,uc001pbd.3,uc001pbf.4,uc009yvj.3,uc010rte.2,uc010rtf.2,uc010rtg.2,uc010rth.2,uc010rti.2,uc010rtj.2	-1.73977	2.77e-26
DIP2C	uc001ifp.3,uc009xhi.1,uc009xhj.1,uc009xhk.1,uc010pzz.1	-1.73753	1.55e-07
DST	uc003pcv.4,uc003pcw.4,uc003pcx.4,uc003pcy.4,uc003pda.4,uc003pdc.4,uc003pdd.4,uc003pde.2,uc010kaa.1,uc011dxl.1,uc021zax.1	-1.7348	1.04e-14
WIPF1	uc002uiz.3,uc002uja.3,uc002ujb.2,uc002ujc.1,uc010fqt.1,uc010zep.1	-1.73425	2.05e-39
NRIP1	uc002yjx.2,uc021whl.1	-1.73067	9.81e-11
EMBP1	uc001eiu.1,uc009wht.1	-1.72734	2.5e-08
PRKACB	uc001dji.3,uc001djj.3,uc001djl.3,uc001djn.3,uc001djo.2,uc001djp.3,uc001djq.3,uc009wcf.2,uc010ort.2,uc010oru.2,uc010orv.2	-1.727	2.75e-31
ITGB3	uc002ili.1,uc002ilj.3,uc010wkr.1	-1.72532	1.64e-10
TLR3	uc003iyq.3,uc003iyr.3,uc011ckz.2	-1.72516	5.8e-08
KCNT2	uc001gtd.1,uc001gte.1,uc001gtf.1,uc001gtg.1,uc001gth.1,uc009wyt.1,uc009wyu.3,uc009wyv.1	-1.72028	0.000195741
LIG4	uc001vqn.3,uc001vqo.3,uc001vqp.3,uc010agf.3,uc010agg.1,uc021rmk.1	-1.71768	3.8e-11
FAM111B	uc001nnl.3,uc001nnm.3,uc010rko.2,uc021qjn.1	-1.71716	4.73e-08
KRT34	uc002hwm.3	-1.71588	0.000170909
FGF13	uc004fam.3,uc004fan.3,uc004faq.3,uc004far.3,uc011mwi.2,uc011mwj.2,uc011mwk.2	-1.71218	5.03e-06
LACC1	uc001uzf.4,uc010acg.3	-1.71168	3.96e-24
HECTD2	uc001khk.2,uc001khl.2,uc001khm.2,uc001khn.1,uc009xty.1,uc010qnm.1	-1.71037	1.05e-09
COL28A1	uc003src.1,uc003srd.3,uc003sre.1,uc011jxe.1	-1.70432	2.41e-17
LTBP1	uc002rou.3,uc002rov.3,uc010ymz.2,uc010yna.2,uc010ynb.2,uc021vft.1	-1.7038	2.52e-54
FAM171B	uc002upr.1,uc002ups.3,uc002upt.3	-1.69877	1.75e-11
KIF20B	uc001kgr.1,uc001kgs.1,uc001kgt.1,uc009xtw.1	-1.69718	2.43e-10
KBTBD8	uc003dmy.3,uc011bfv.2	-1.6968	5.05e-08
C1S	uc001qsj.3,uc001qsk.3,uc001qsl.3,uc009zfr.3,uc009zfs.3	-1.69675	1.43e-06
LRRC8C	uc001dnl.4	-1.69648	7.07e-34
HNRNPU-AS1	uc001iav.3	-1.69633	5.15e-16
LOC100379224	uc002oyi.3	-1.69364	0.000159913
STEAP4	uc003ujs.3,uc010lek.3,uc022agz.1	-1.69308	1.18e-06
GPAM	uc001kzp.3,uc001kzq.1,uc009xxy.2	-1.69211	2.38e-26
SLC26A7	uc003yex.3,uc003yey.3,uc003yez.3,uc003yfa.3	-1.68954	6.48e-05
AK022997	uc001szi.3	-1.68867	0.000225647
PSG1	uc002oug.1,uc002oun.3,uc002ouz.2,uc002ova.2,uc002ovb.3,uc002ovc.3,uc002ovd.1	-1.6874	0.000262937
STARD4-AS1	uc021ych.1	-1.68676	3.4e-11
ZNF260	uc002oed.2,uc002oee.2,uc002oef.2,uc010eey.2,uc021uti.1	-1.68664	2.04e-12
ZNF644	uc001dnv.3,uc001dnw.3,uc001dnx.3,uc001dny.2	-1.68591	1.16e-28
LCA5	uc003pix.3,uc003piy.3,uc011dyr.2	-1.68423	3.8e-08
IFT80	uc003fda.3,uc003fdb.2,uc003fdd.2,uc003fde.2,uc021xgq.1,uc021xgr.1	-1.68321	2.44e-09
CLCA2	uc001dlr.4	-1.683	2.77e-17
MIR17HG	uc001vlq.1,uc010tie.1	-1.68167	1.49e-07
SLITRK6	uc001vll.1,uc021rla.1	-1.68011	1.69e-13
AK123459	uc001vjx.1	-1.67988	1.23e-05
C10orf118	uc001lbb.1,uc001lbc.1,uc001lbd.3,uc001lbe.3,uc009xyd.1,uc009xye.1	-1.67932	1.23e-15
SKIL	uc003fgu.3,uc003fgv.3,uc003fgw.3,uc011bps.2	-1.679	2.47e-16
CEACAM6	uc002orm.2	-1.67583	5.06e-05
CDH6	uc003jhc.2,uc003jhd.2,uc003jhe.2	-1.6757	2.93e-05
PCDHGB5	uc003lkf.2,uc011daw.2	-1.67418	0.000219349
KPNA5	uc003pxh.3	-1.6739	4.89e-07
SYTL5	uc004ddu.3,uc004ddv.3,uc004ddx.3	-1.67372	3.76e-05
CNRIP1	uc002sej.4,uc002sek.4,uc010fdd.1	-1.67372	0.000283137
EFCAB1	uc003xqn.3,uc003xqo.2,uc010lxx.2,uc011ldj.1,uc011ldk.1	-1.67231	7.76e-08
ABCA6	uc002jhw.1,uc002jhy.3	-1.67185	3.88e-18
SESN3	uc001pfl.3	-1.66975	0.000281317
STC2	uc003mcn.1,uc003mco.1	-1.66973	1.5e-145
AK055197	uc021sou.1	-1.66645	2.66e-08
BCHE	uc003fem.4,uc003fen.4	-1.66399	3.72e-12
MUC5B	uc001lta.3,uc009yct.2,uc021qbr.1	-1.66346	2.97e-05
TNFAIP3	uc021zfv.1	-1.6602	1.1e-06
NEDD9	uc003mzv.2,uc003mzw.3,uc003mzx.3,uc010joz.2	-1.65967	3.62e-08
ZNF33B	uc001jad.3,uc001jae.1,uc001jaf.1,uc001jag.1,uc009xmg.1	-1.6583	3.88e-27
PIBF1	uc001vjb.3,uc001vjc.3,uc010aeo.1,uc010aep.3	-1.65777	3.53e-13
EEA1	uc001tck.3	-1.65717	3.2e-22
ELTD1	uc001diq.4	-1.65625	0.000259663
GHR	uc003jmt.3,uc003jmu.3,uc003jmv.2,uc003jmw.2,uc011cpq.2,uc021xxv.1,uc021xxw.1,uc021xxx.1,uc021xxy.1,uc021xxz.1,uc021xya.1,uc021xyb.1,uc021xyc.1,uc021xyd.1	-1.65421	4.91e-05
MATN3	uc002rdl.3,uc010exu.1	-1.65355	1.21e-23
TNR	uc001gkp.1,uc009wwu.1,uc010pmz.1	-1.65299	0.000324554
COL4A4	uc021vxr.1,uc021vxs.1	-1.65175	3.18e-06
ZEB2	uc002tvu.3,uc002tvv.3,uc002tvw.3,uc002tvx.1,uc002tvy.3,uc002twa.3,uc010fnp.3,uc010fnq.1,uc010zbm.2	-1.65156	4.78e-28
CYP1A1	uc002ayp.4,uc002ayq.4,uc010bju.3,uc010bjv.3,uc010bjw.3,uc010bjx.3,uc010bjy.3,uc010bjz.1,uc021sqk.1	-1.65137	4.82e-05
TPR	uc001grv.3,uc010pop.2	-1.65116	1.22e-12
RRM2B	uc003ykn.3,uc003yko.3,uc010mbv.2,uc010mbw.1,uc010mbx.1,uc010mby.1,uc022azl.1	-1.65022	1.23e-23
AF086126	uc002dkc.2	-1.64942	8.47e-07
RTN1	uc001xek.2,uc001xem.1,uc001xen.1,uc010apl.2	-1.64859	4.85e-05
ZRANB2-AS1	uc001dfr.3	-1.64856	1.07e-05
CNTNAP3B	uc004abr.1,uc004acz.2,uc004ada.2,uc004adb.3	-1.64738	2.03e-10
MGAT4A	uc002sze.3,uc010fil.3,uc010fim.1,uc010yvm.2	-1.6468	3.27e-09
ZNF300P1	uc003lsz.1,uc003lta.2	-1.64273	0.000341299
KMO	uc001hyy.3,uc009xgo.2,uc009xgp.3	-1.6401	1.32e-13
FILIP1L	uc003dtm.3,uc003dtn.3,uc003dto.3,uc003dtp.1,uc010hpf.3,uc010hpg.3,uc021xbr.1	-1.63991	0.000375746
HPGD	uc011ckh.1	-1.6388	2.45e-15
NUCB2	uc001mms.1,uc001mmt.1,uc001mmu.1,uc001mmv.1,uc001mmw.3,uc009ygw.1,uc009ygx.1,uc009ygy.1,uc009ygz.3,uc009yha.3	-1.6375	4.98e-34
APC	uc003kpy.4,uc003kpz.4,uc010jbz.3,uc010jca.3,uc011cvt.2	-1.63633	1.44e-12
CCDC88A	uc002rys.3,uc002ryt.2,uc002ryu.2,uc002ryv.2,uc002ryw.3,uc010fbw.2,uc010fby.1,uc010fbz.3,uc010yoz.1,uc010ypa.1,uc010ypb.1	-1.63494	6.49e-12
SLC2A14	uc001qtk.3,uc001qtl.3,uc001qtm.3,uc001qtn.3,uc010sgg.2,uc010sgh.2	-1.63456	0.000101668
CENPC1	uc003hdd.1,uc010ihj.1,uc010ihk.1,uc010ihl.3,uc010ihm.1	-1.63293	1.86e-23
AX747619	uc002alq.1	-1.63121	1.88e-07
ENPP5	uc003oxz.1,uc003oya.1,uc010jzc.1,uc011dvz.1	-1.62801	0.000436527
SNX10	uc003sxx.3,uc010kuu.3,uc010kuv.3,uc010kuw.3,uc011jzg.2	-1.62776	1.78e-08
NOSTRIN	uc002uef.3,uc002ueg.3,uc002ueh.3,uc002uek.3,uc010fpu.3	-1.62215	0.000238117
FAM167A	uc003wtw.2,uc010lry.1	-1.62186	4.61e-24
NEAT1	uc010rog.2	-1.62137	8.39e-19
SEPT5-GP1BB	uc002zpv.2,uc002zpw.1,uc002zpx.1,uc002zpz.2	-1.62091	1.36e-05
KLHDC1	uc001www.3,uc010tqg.2,uc010tqh.2	-1.6207	0.000314519
PPAPDC1A	uc001lev.1,uc001lew.1,uc001lex.1,uc001ley.1,uc009xzl.1,uc010qtd.2	-1.61836	0.000287374
TGFB2	uc001hll.3,uc001hlm.3,uc001hln.3,uc001hlo.3,uc010pue.2	-1.61625	4.55e-31
RCAN2	uc003oyb.2,uc003oyc.2,uc003oyd.2	-1.61407	0.000117702
LINC00202-1	uc001itf.2	-1.61361	0.000342496
TMOD2	uc002abk.3,uc002abl.4,uc010bfb.3	-1.61114	2e-09
ATP6V0A4	uc003vuf.3,uc003vug.3,uc003vuh.3	-1.60991	9.73e-11
ZNF469	uc002fku.2	-1.60537	8.07e-09
GBP1	uc001dmx.2	-1.60427	3.3e-22
AK097288	uc003jox.1	-1.60252	1.94e-05
DZIP1	uc001vmj.3	-1.60211	3.8e-07
ZNF638	uc002shw.3,uc002shx.3,uc002shy.3,uc002shz.3,uc002sia.3,uc002sib.1,uc002sic.3,uc002sid.3,uc010fec.2,uc010yqw.1	-1.59996	4.08e-11
SAMD5	uc003qmc.2	-1.5992	7.9e-11
LRRC49	uc002asu.3,uc002asw.3,uc002asx.3,uc002asy.3,uc002asz.3,uc010ukf.2	-1.59714	9.76e-07
TMEFF2	uc002utc.3,uc002utd.1	-1.5962	0.000558664
ZDBF2	uc002vbp.2	-1.59372	1.28e-09
AMIGO2	uc001rpk.3,uc001rpl.3,uc001rpm.3,uc021qxg.1	-1.59213	1.27e-20
SCARA3	uc003xga.1,uc003xgb.1	-1.59169	6.75e-18
C5	uc004bkv.3,uc010mvm.1,uc010mvn.1	-1.59126	6.45e-11
AL049948	uc021vts.1	-1.5906	0.000185116
KIAA1109	uc003ieh.3,uc003iei.1,uc003iej.1,uc003iek.2,uc003iel.1,uc003iem.3,uc003ien.3,uc010ins.1	-1.5891	6.82e-21
GGT8P	uc010fho.1	-1.58829	1.2e-09
NANOS1	uc009xzf.1	-1.58619	9.45e-13
STEAP2	uc003ujy.2,uc003ujz.3,uc003uka.3,uc003ukb.3,uc003ukc.3,uc003ukd.3,uc010len.3	-1.5852	4.69e-08
SMIM5	uc002jow.2	-1.58397	0.000590059
LHFP	uc001uxf.3	-1.58386	7.74e-08
STON1	uc002rwo.4,uc010fbm.3	-1.58249	1.22e-07
DYNLT3	uc004dds.3	-1.5815	2.26e-09
TMF1	uc003dnn.3,uc011bfx.2	-1.58076	1.01e-21
RECQL	uc001rex.3,uc001rey.3	-1.57923	3.4e-08
NLRP1	uc002gcg.1,uc002gch.4,uc002gci.3,uc002gcj.3,uc002gck.3,uc002gcl.3,uc010clh.3	-1.57865	4.35e-05
TRIP11	uc001xzy.3,uc001xzz.4,uc010auf.2	-1.57789	1.15e-13
AK093898	uc001pdl.1	-1.57456	1.12e-09
CUL4B	uc004esv.3,uc004esw.3,uc010nqq.3	-1.57371	6.66e-27
DMXL2	uc002abc.3,uc002abd.3,uc002abf.3,uc002abg.3,uc010bfa.3,uc010ufy.2	-1.57294	5.86e-17
ANKRD12	uc002knv.3,uc002knw.3,uc002knx.3,uc010dkx.1,uc010wzn.2	-1.57267	2.98e-08
EGR3	uc003xcm.1,uc011kzn.1,uc011kzo.2	-1.57116	1.23e-06
TOX	uc003xtw.1	-1.5708	0.000639265
TRHDE	uc001sxa.3	-1.5696	3.64e-05
SENP7	uc003dus.3,uc003dut.3,uc003duu.3,uc003duv.3,uc003duw.3,uc003dux.3	-1.5683	3.56e-08
UGGT2	uc001vms.3,uc001vmt.3,uc001vmu.1,uc001vmv.3,uc010afo.3	-1.56794	5.13e-09
SLC16A9	uc010qig.1	-1.56709	0.000211327
ABCC9	uc001rfh.3,uc001rfi.1,uc001rfk.3,uc001rfl.1	-1.56562	9.04e-18
SAMSN1	uc002yjv.1	-1.56551	2.1e-10
AR	uc004dwu.2,uc004dwv.2,uc011mpd.2,uc011mpe.1,uc011mpf.1,uc022byj.1,uc022byk.1	-1.56498	5.34e-16
PLAG1	uc003xsq.4,uc003xsr.4,uc010lyi.3,uc010lyj.3,uc022aur.1	-1.56457	6.56e-11
CCDC18	uc001dpr.1,uc009wdl.1,uc021opx.1	-1.56333	6.09e-06
VPS13A	uc004akp.4,uc004akq.4,uc004akr.3,uc004aks.3,uc004akt.3,uc010mpo.1	-1.55874	2.17e-11
JMJD1C	uc001jmk.3,uc001jml.3,uc001jmm.3,uc001jmn.3,uc001jmo.3,uc001jmp.1,uc001jmr.1,uc009xpi.3,uc009xpj.2,uc009xpk.1,uc010qiq.2	-1.55527	2e-09
CHD1	uc003knf.3,uc010jbn.3	-1.55473	9.55e-09
CNTNAP1	uc002iay.3,uc010wgs.2	-1.55451	4.96e-08
THOC2	uc004etu.3,uc004etv.4,uc004etw.1,uc010nqt.1,uc011muh.1,uc011mui.1	-1.55404	1.8e-13
ZNF292	uc003plk.3,uc003pll.1,uc003plm.4	-1.55193	2.37e-14
DDX60L	uc003irq.4,uc003irr.1,uc003irs.1,uc003irt.1,uc021xuh.1	-1.54988	9.96e-19
IFT81	uc001tqg.3,uc001tqh.3,uc001tqi.3,uc001tqj.3	-1.54713	1.07e-13
SSTR1	uc001wul.1,uc021rsi.1	-1.54552	0.000580063
NEB	uc002txq.3,uc002txr.3,uc002txt.4,uc002txu.3,uc010fnx.3,uc010fny.2,uc010zbz.2,uc010zca.2,uc010zcb.2,uc021vrb.1,uc021vrc.1,uc021vrd.1	-1.54458	0.000106361
ASPM	uc001gtu.3,uc001gtv.3,uc001gtw.4	-1.54077	3.78e-09
TTC37	uc003klb.3,uc010jbf.2	-1.54039	8.31e-11
COMMD8	uc003gxi.3	-1.53919	2.09e-07
SGOL2	uc002uvv.4,uc002uvw.2,uc010zhd.1,uc010zhe.1	-1.53883	1.27e-08
CDYL2	uc002ffs.3	-1.53774	0.000265583
SOCS4	uc001xbo.3,uc001xbp.3,uc021rti.1	-1.53576	2.08e-19
ZNF624	uc010cpi.2,uc021tre.1	-1.5347	2.98e-07
WDR35	uc002rdh.3,uc002rdi.3,uc002rdj.3,uc002rdk.4,uc010ext.3	-1.53387	5.62e-21
FSD1L	uc004bcp.3,uc004bcq.2,uc011lvv.1,uc011lvw.1	-1.53377	2.82e-13
NT5E	uc003pkn.3,uc003pko.4,uc010kbr.3	-1.53339	4.82e-57
UACA	uc002asq.3,uc002asr.3,uc010bin.1,uc010uke.2	-1.53194	1.83e-07
LOC399815	uc001lgu.3,uc010qua.1	-1.53124	0.000887592
FSIP2	uc002upj.2,uc002upl.3,uc002upm.3,uc010frr.2	-1.53101	0.000507728
VPS13C	uc002agz.3,uc002aha.3,uc002ahb.2,uc002ahc.2,uc002ahd.1	-1.53093	5.01e-11
NEDD4	uc002adi.3,uc002adj.3,uc002adk.3,uc002adl.3,uc010bfm.3,uc010ugj.2	-1.53024	3.97e-11
ESCO1	uc002kth.1,uc002kti.1	-1.53012	4.16e-14
PYROXD1	uc001rew.3,uc009ziq.3	-1.52955	1.53e-13
CD2AP	uc003oyw.3	-1.52932	1e-14
NEMF	uc001wwz.3,uc001wxa.3,uc001wxc.3,uc001wxd.1,uc001wxe.2,uc010anj.1,uc010anq.1,uc010tqi.2	-1.52894	3.47e-10
MYH15	uc003dxa.1	-1.52806	0.000110664
WDR17	uc003iuj.3,uc003iul.2,uc003ium.4,uc003iun.3,uc021xup.1	-1.52728	1.74e-07
PDE5A	uc003idf.3,uc003idg.3,uc003idh.3	-1.5262	7.08e-10
ANO3	uc001mqt.4,uc010rdr.2,uc010rds.2,uc010rdt.2	-1.52498	0.000292012
ARL14	uc003fdq.3	-1.52468	1.17e-09
VGLL3	uc003dqn.3	-1.52403	7.26e-24
IFIT3	uc001kgf.3,uc001kgg.3	-1.51797	5.84e-07
RICTOR	uc003jlo.2,uc003jlp.2,uc003jlq.1,uc010ivf.2,uc011cpk.1	-1.51789	5.23e-16
ATM	uc001pkb.1,uc001pkc.1,uc001pkd.4,uc001pke.2,uc001pkf.3,uc001pkg.1,uc009yxr.1,uc009yxs.1,uc009yxt.1	-1.51674	4.46e-19
CXorf23	uc004czo.3,uc004czp.3,uc011mjg.2	-1.51504	6.28e-13
KTN1	uc001xcb.3,uc001xcc.3,uc001xcd.3,uc001xce.3,uc001xcg.3,uc010aoq.3,uc010trb.2,uc010trc.2	-1.51187	5.88e-10
SNAPC1	uc001xft.3	-1.50883	2.79e-17
TSGA10	uc002szg.4,uc002szh.4,uc002szi.4,uc002szj.1,uc010fin.1,uc010yvn.1	-1.50807	8.36e-07
LOC100506123	uc002sxv.4,uc021vll.1	-1.50672	2.4e-11
ZNF180	uc002ozf.4,uc002ozg.4,uc002ozh.4,uc002ozi.4,uc010ejm.3	-1.50557	6.87e-15
USP53	uc003icr.4,uc003ics.4,uc003ict.3,uc003icu.4	-1.50494	3.38e-14
LOC202181	uc011dgb.1,uc011dgc.2	-1.50332	2.88e-05
N4BP2	uc003guy.4,uc010ifq.3,uc010ifr.3	-1.50295	3.45e-05
CCBE1	uc002lia.3,uc002lib.3,uc010dpq.3	-1.50251	5.55e-14
TGFBR3	uc001doh.3,uc001doi.3,uc001doj.3,uc009wde.3,uc010osy.2	-1.50027	2.98e-18
CCDC158	uc003hkb.4,uc003hkd.3	-1.49935	0.00112389
STXBP3	uc001dvy.3,uc021oqz.1	-1.49892	4.26e-12
RIF1	uc002txl.3,uc002txm.3,uc002txn.3,uc002txo.3,uc002txp.3,uc010fnv.2,uc010zby.1	-1.49703	6.34e-08
RANBP2	uc002tem.4	-1.49689	6.47e-13
BLZF1	uc001gfw.3,uc001gfx.2,uc001gfy.3,uc009wvp.1	-1.49684	3.34e-08
TRPC4	uc001uws.3,uc001uwt.3,uc010abv.3,uc010abw.3,uc010abx.3,uc010aby.3,uc010tey.2	-1.49552	0.000929258
FLJ35282	uc003zpq.1	-1.49459	0.000372118
7-Sep	uc010kxc.3,uc011kat.2,uc011kau.2,uc011kav.2	-1.49389	3.03e-15
KIAA1731	uc001pdu.1,uc001pdw.1,uc001pdx.1,uc009ywb.1	-1.4923	2.69e-08
PIK3C2A	uc001mmq.4,uc001mmr.3,uc009ygu.1,uc009ygv.1,uc010rcw.2,uc010rcx.1	-1.49021	3.98e-13
LOC100505702	uc003hlf.3,uc003hlg.3,uc003hlh.3,uc003hli.3,uc021xpj.1,uc021xpk.1	-1.49012	3.62e-05
LOC100507557	uc003qky.2,uc003qlb.3,uc010khs.2	-1.48967	0.0013844
ZFYVE16	uc003kgp.3,uc003kgq.4,uc003kgr.4,uc003kgs.4,uc003kgt.4,uc003kgu.4,uc010jak.2	-1.48806	7.09e-09
CCDC39	uc003fkn.3,uc010hxe.3	-1.4876	2.64e-05
SEMA3C	uc003uhj.3,uc011kgw.2,uc011kgx.1	-1.48607	2.01e-10
ETV1	uc003ssw.4,uc003ssx.3,uc010ktv.3,uc021zzt.1,uc021zzu.1,uc021zzv.1,uc021zzw.1,uc021zzx.1,uc021zzy.1,uc021zzz.1,uc022aaa.1,uc022aab.1,uc022aac.1,uc022aad.1	-1.48454	1.39e-08
PRKAA2	uc001cyk.4	-1.48167	4.68e-19
PRDM8	uc003hmb.4,uc003hmc.4,uc010ijo.3	-1.47783	5.24e-06
LOC344887	uc010hyo.2	-1.47751	5.53e-08
PHIP	uc003pio.4,uc003piq.3,uc003pir.3,uc011dyp.2	-1.47657	3.67e-08
ZNF441	uc002msn.4,uc010dyj.3	-1.47645	3.18e-07
AJ420595	uc010keg.2	-1.47442	5.26e-05
BRCA2	uc001uua.1,uc001uub.1	-1.47436	1.1e-06
PLP1	uc004elj.3,uc004elk.3,uc010nov.3,uc010now.1,uc010nox.3,uc011msf.2	-1.47332	0.00154904
IGFBP3	uc003tnq.3,uc003tnr.3,uc003tns.3,uc003tnt.3	-1.4733	1.07e-52
WNT5A	uc003dhm.3	-1.47175	3.45e-62
CREBRF	uc003mcf.3,uc003mcg.3,uc003mch.3,uc011dfd.1	-1.4707	6.19e-19
VIM	uc001iou.2	-1.46868	2.19e-20
RUNX2	uc003oxs.1,uc003oxt.3,uc011dvx.2,uc011dvy.2	-1.46619	6.06e-09
FLJ22447	uc021rtz.1	-1.46569	0.00155581
CBWD5	uc004ack.3,uc004acm.3,uc004afw.3	-1.465	5.85e-11
ROS1	uc003pxp.1,uc011ebi.1	-1.46318	8.4e-17
ESF1	uc002woj.3	-1.4626	5.14e-07
DLC1	uc003wwk.1,uc003wwl.1,uc003wwm.2,uc003wwn.3,uc011kxx.1,uc011kxy.2	-1.46201	6.04e-39
BC041459	uc003qeg.1	-1.45909	0.000315703
ZNF518B	uc003gmn.3,uc021xme.1	-1.4566	0.000318165
ANK1	uc003xoc.3,uc003xod.3,uc003xof.3,uc003xoh.3,uc003xoi.3,uc003xoj.3,uc003xok.3,uc003xol.3,uc003xom.3,uc011lcl.2	-1.45653	0.000245067
CRISPLD2	uc002fik.4,uc002fil.2,uc002fim.2,uc002fin.4,uc010vog.1,uc010voh.1	-1.45633	1e-09
FRMD6	uc001wzc.3,uc001wzd.3,uc001wze.3,uc001wzf.3,uc001wzg.3	-1.4531	7e-31
PLCB4	uc002wnh.3,uc010gbw.1,uc010gbx.3,uc021wal.1,uc021wam.1	-1.45148	4.49e-09
TNFAIP6	uc002txk.3	-1.45009	0.00177462
SGCB	uc003gzj.2,uc011bzp.1	-1.44969	1.25e-26
NR2F1	uc003kkj.3,uc021ybj.1,uc021ybk.1	-1.44881	8.21e-11
ZNF559	uc002mld.3,uc002mle.4,uc002mlf.3,uc010dwk.2,uc010dwl.2,uc010xkn.2,uc021uoj.1,uc021uok.1,uc021uol.1,uc021uom.1	-1.44834	1.89e-13
HMGA2	uc001ssp.1,uc001sss.1,uc001sst.1,uc001ssu.1,uc001ssv.3,uc001ssw.1,uc001ssx.3,uc001ssy.3,uc010ssv.1	-1.44793	1.91e-32
SNCA	uc003hso.3,uc003hsp.3,uc003hsq.3,uc003hsr.3,uc021xqc.1	-1.44775	2.06e-06
BAI2	uc001btn.3,uc001bto.3,uc001btp.1,uc001btq.1,uc010ogn.2,uc010ogo.2,uc010ogp.2,uc010ogq.2,uc010ogr.1	-1.44731	2.37e-08
SLC9A2	uc002tca.3	-1.44666	0.00192256
BC042616	uc003oye.3	-1.44601	1.35e-09
CCDC85A	uc002rzn.3,uc021vhw.1	-1.4453	8.26e-05
SOWAHB	uc003hki.3	-1.44349	0.00196761
BC036412	uc002qnp.1	-1.44315	0.000931328
EREG	uc003hid.3,uc003hie.1	-1.4419	1.74e-15
FYN	uc003pvh.3,uc003pvi.3,uc003pvj.3,uc003pvk.3,uc010kdy.1	-1.44088	1.9e-18
RMDN2	uc002rqk.1,uc002rql.3,uc002rqm.3,uc002rqn.2,uc021vga.1	-1.44049	6.28e-06
GPR137C	uc001wzt.4,uc001wzu.4	-1.43987	0.000247316
GCC2	uc002tec.3,uc002ted.3	-1.43973	1.1e-08
YJEFN3	uc002nmt.2,uc002nmu.2,uc010ecf.2,uc021uqw.1	-1.43928	0.000197741
IL18R1	uc002tbw.4,uc010fiy.3,uc010ywb.1,uc010ywc.2,uc010ywd.2	-1.43903	0.00169572
TRIM23	uc003jtw.3,uc003jtx.3,uc003jty.3	-1.43845	2.21e-08
PTBLP	uc021oqi.1	-1.43828	2.26e-06
RPGR	uc004dea.3,uc004deb.3,uc004dec.3,uc004ded.1	-1.43749	5.5e-11
EFCAB7	uc001dbf.3	-1.43619	1.08e-09
FLG	uc001ezu.1	-1.43615	0.000387048
PNISR	uc003ppo.4,uc003ppp.4,uc003ppr.2,uc003pps.2,uc003ppt.2,uc011eag.2,uc021zdd.1	-1.43356	6.01e-20
ACSBG1	uc002bdh.3,uc010umw.2,uc010umx.2,uc010umy.2	-1.43171	0.000443341
EDIL3	uc003kio.1,uc003kip.1,uc011ctt.1	-1.4302	0.00204401
TMEM156	uc003gto.3,uc010ifj.3	-1.42944	1.01e-11
ZDHHC17	uc001syi.1,uc001syj.2,uc001syk.1	-1.42583	1.45e-12
ZNF107	uc003ttd.3,uc003tte.3	-1.42414	2.9e-11
TMTC3	uc001tau.3,uc009zsm.2	-1.42393	2.81e-07
LUM	uc001tbm.3	-1.42317	0.00182644
WDR78	uc001dcx.3,uc001dcy.3,uc009waw.3,uc009wax.3	-1.42312	3.43e-06
PPIG	uc002uez.3,uc002ufa.3,uc002ufb.3,uc002ufc.1,uc002ufd.3,uc010fpx.3,uc010fpy.3	-1.42083	2.27e-08
NPNT	uc003hya.3,uc011cfc.2,uc011cfd.2,uc011cfe.2,uc011cff.2	-1.42081	7.23e-06
UPF2	uc001ila.3,uc001ilb.3,uc001ilc.3,uc009xiz.2	-1.42053	9.23e-11
HEPHL1	uc001pep.2	-1.4193	0.00194375
GOLGA4	uc003cgu.2,uc003cgv.3,uc003cgw.3,uc003cgx.3,uc010hgr.2,uc010hgs.3	-1.41845	1.27e-07
REV3L	uc003puw.4,uc003pux.4,uc003puy.4,uc003puz.4,uc003pva.1	-1.41818	1.09e-08
TRPM7	uc001zyr.3,uc001zyt.4,uc001zyu.3,uc010bew.2	-1.41798	2.59e-16
TBC1D8B	uc004emm.3,uc004emn.3,uc004emo.3	-1.41582	2.5e-16
RAB31	uc002kog.2	-1.41564	6.59e-18
ZNF594	uc010cla.1,uc021tol.1	-1.41544	3.34e-08
ANKRD31	uc003kdo.2	-1.415	0.00227387
RAB8B	uc002alz.3,uc010uih.2	-1.41228	1.22e-09
CAPS2	uc001sxi.4,uc001sxj.4,uc001sxk.4,uc001sxl.3,uc001sxm.3,uc009zsa.2	-1.41192	0.000131151
ZSWIM5	uc001cnd.2	-1.41186	2.06e-05
ZNF782	uc004awp.1,uc011lup.1	-1.41022	8.78e-07
SLC2A13	uc001rme.1,uc001rmf.3,uc010skm.2	-1.40968	5.41e-09
NXF3	uc004eju.3,uc010noi.1,uc011mrw.1,uc011mrx.1	-1.40955	0.00141736
SPDL1	uc003mae.4,uc010jjj.3,uc010jjk.3,uc011deq.2	-1.40935	2e-09
AK056252	uc003fiz.1	-1.40922	1.77e-08
NPAT	uc001pjz.4,uc001pka.3,uc010rvv.2	-1.40866	1.66e-11
CENPF	uc001hkm.3	-1.4082	1.88e-07
USP32P1	uc002gqm.2,uc010cpj.1,uc010cpk.1,uc010vwq.1	-1.40744	4.13e-14
ZNF146	uc002odq.4,uc010eet.3,uc010eeu.3,uc021ute.1	-1.40619	1.08e-13
SMC3	uc001kze.3	-1.40543	4.16e-12
COL6A1	uc002zhu.1,uc002zhv.1	-1.40481	0.000184284
SEMA3A	uc003uhz.3	-1.40419	9.79e-07
RSF1	uc001oym.3,uc001oyn.3,uc001oyo.1	-1.40269	1.97e-17
CCNE2	uc003yhc.3,uc003yhd.2	-1.40139	2.25e-06
ZNF92	uc003ttz.3,uc003tua.3,uc003tub.3,uc010kzu.3,uc022afd.1	-1.40087	1.24e-06
EIF5A2	uc003fhd.3	-1.40054	4.85e-15
NTNG1	uc001dvc.4,uc001dvd.1,uc001dve.3,uc001dvf.4,uc001dvg.3,uc001dvh.4,uc001dvi.3,uc009wek.3,uc009wem.3,uc010out.2	-1.40017	4.89e-06
TRPC1	uc003evb.3,uc003evc.3,uc011bni.1	-1.3994	2.76e-07
AX747158	uc001kas.1	-1.39818	0.00123448
IFIT5	uc010qng.1,uc010qnh.2	-1.39753	1.66e-10
TLL1	uc003irh.2,uc011cjn.2,uc011cjo.2,uc021xud.1	-1.3975	1.98e-11
PRG4	uc001grt.4,uc001gru.4,uc009wyl.3,uc009wym.3,uc010poo.2	-1.39723	0.00271731
RNF212	uc003gci.3,uc003gcj.3,uc010ibp.3,uc010ibq.3,uc021xkh.1	-1.3947	4.3e-05
C12orf23	uc001tmb.3,uc001tmc.3,uc001tmd.3	-1.3941	5.92e-34
ARHGAP5	uc001wrl.3,uc001wrm.3,uc001wrn.3,uc001wro.3,uc001wrp.3	-1.39408	2.38e-13
AX746567	uc003vlq.1	-1.39402	0.00124121
KIAA1033	uc001tld.3,uc010swr.2,uc010sws.2	-1.39271	1.23e-09
PCDHA12	uc003lic.2,uc011daf.2	-1.39118	8.22e-09
USP15	uc001sra.3,uc001srb.2,uc001src.2,uc010ssj.2,uc010ssk.2	-1.39013	2.83e-09
ITGB1	uc001iwr.4,uc001iws.4,uc001iwt.4	-1.38899	5.26e-14
PDK4	uc003unz.3,uc003uoa.3	-1.38883	2.04e-11
CHM	uc004eet.3,uc004eeu.4,uc004eev.4,uc011mqz.2	-1.3883	3.48e-08
ZNF91	uc002nre.3,uc010xrj.2	-1.38817	7.03e-15
APCDD1L	uc002xze.1,uc010zzp.1	-1.38659	1.54e-07
HIF1A-AS2	uc021ruc.1	-1.38649	0.00289344
C21orf91	uc002yko.4,uc002ykp.4,uc002ykq.4	-1.38587	1.11e-08
NTF3	uc001qnk.4,uc001qnl.4	-1.38432	2.71e-07
NFKBIZ	uc003dvo.3,uc003dvp.3,uc003dvq.3,uc010hpo.3	-1.38273	3.75e-16
AK126318	uc002ivh.1	-1.38246	1.16e-15
ZNF148	uc003ehx.4,uc003ehy.3,uc003ehz.4,uc003eia.4,uc010hsa.3	-1.38199	6.04e-22
GIN1	uc003koa.1,uc003kob.1,uc003koc.1	-1.38154	1e-09
CHRM3	uc001hyo.1,uc001hyp.3,uc021plc.1	-1.38087	0.00054912
PTPRG-AS1	uc003dle.4,uc010hnp.3	-1.37979	0.0010483
BAZ2B	uc002uao.3,uc002uap.3,uc002uaq.1,uc002uar.1,uc002uas.1,uc002uat.4,uc002uau.1,uc010fop.1	-1.37885	1.65e-07
PARM1	uc003hih.2	-1.37858	0.00166263
RGPD4	uc002tdu.3,uc010ywk.2,uc010ywl.2	-1.37821	0.000231311
BCLAF1	uc003qgw.1,uc003qgx.1,uc003qgy.1,uc011edb.1,uc011edc.1,uc011edd.1,uc011ede.1	-1.37813	6.41e-09
ZBTB41	uc001gtx.1,uc009wyz.1	-1.37536	6.37e-09
AX746764	uc004axt.1	-1.37454	0.000925065
MYSM1	uc001cza.3,uc001czc.3,uc001czd.3,uc009wab.2	-1.37412	4.86e-09
NFE2L3	uc003sxq.3	-1.37381	4.26e-08
ZNF518A	uc001klo.1,uc001klp.3,uc001klq.3,uc001klr.3	-1.37352	8.29e-06
ATOH8	uc002sqm.4,uc002sqn.3	-1.3734	7.2e-18
APLP1	uc002oce.3,uc002ocf.3,uc002ocg.3,uc010xsz.2,uc010xta.2	-1.37277	5.1e-12
FAR1	uc001mld.3,uc009ygp.3	-1.37266	1.33e-10
NKTR	uc003cll.1,uc003clm.1,uc003clo.3,uc003clp.3,uc003clq.1,uc003clr.1,uc003cls.3,uc011azp.2	-1.37175	8.06e-07
GLIS3	uc003zhv.1,uc003zhw.1,uc003zhx.1,uc003zhy.1,uc003zhz.1,uc003zib.1,uc003zic.1,uc003zid.1,uc003zie.1,uc003zif.1,uc003zig.1,uc003zih.1,uc003zii.1,uc010mhf.1,uc010mhg.1,uc010mhh.1,uc010mhi.1	-1.37145	9.72e-12
CHML	uc001hzd.3	-1.37082	1.14e-05
OSBPL8	uc001sye.1,uc001syf.1,uc001syg.1,uc001syh.1	-1.36867	1.35e-10
ELOVL4	uc003pja.4	-1.36863	4.94e-12
BVES	uc003pqw.3,uc003pqx.3,uc003pqy.3	-1.36805	3.92e-09
BX537811	uc001byp.3	-1.36801	4.29e-06
CEP170	uc001hzr.3,uc001hzv.1,uc021plo.1,uc021plp.1,uc021plq.1,uc021pls.1	-1.36496	2.01e-17
FRMD3	uc004amq.1,uc004amr.1,uc004ams.2,uc022biz.1,uc022bja.1	-1.36494	6.43e-11
MMP2	uc002ehz.4,uc010ccc.3,uc010vhd.2	-1.36375	7.37e-16
BC073817	uc002bwp.3	-1.36342	3.66e-07
PMS1	uc002urh.4,uc002uri.4,uc002urj.3,uc002urk.4,uc002url.3,uc002urm.3,uc002urn.1,uc010fry.1,uc010frz.3,uc010zfz.1,uc010zga.1,uc010zgb.1,uc010zgc.2,uc010zgd.2	-1.3624	2.62e-12
SEC62	uc003fgg.3,uc003fgh.3	-1.36104	3.35e-10
ABCA1	uc004bcl.3,uc004bcm.3,uc010mti.1	-1.35981	0.000929397
DNAJB4	uc001dij.3,uc010orn.2	-1.35932	6.34e-11
GPR173	uc004dru.3,uc022bxc.1	-1.35926	0.000162039
HRIHFB2017	uc010ijm.2	-1.3592	1.43e-10
KCNIP4	uc003gqe.2,uc003gqf.1,uc003gqg.1,uc003gqh.1,uc003gqi.1,uc021xms.1,uc021xmt.1,uc021xmu.1	-1.35848	0.00026722
C9orf47	uc004aqc.2,uc004aqd.3	-1.3579	0.000252218
AK055370	uc002ade.1	-1.35688	4.96e-05
SLC25A27	uc003oyg.3,uc003oyh.3,uc003oyi.3,uc011dwb.2,uc011dwc.2	-1.35491	8.57e-07
F3	uc001dqp.2,uc001dqq.2,uc001dqr.3,uc001dqs.3,uc001dqt.3	-1.35478	9.3e-22
DMTF1	uc003uih.3,uc003uii.3,uc003uij.3,uc003uik.3,uc003uil.3,uc003uim.1,uc003uin.3,uc011khb.2	-1.35361	3.91e-08
GNG2	uc001wzh.3,uc001wzi.3,uc001wzj.3,uc001wzk.3,uc010aoc.2,uc021rte.1	-1.35291	3.6e-19
DNTTIP2	uc001dqf.3,uc009wdo.2,uc010otm.2	-1.35222	8.52e-07
ZNF780B	uc002omu.3,uc002omv.3	-1.35214	1.71e-17
GEM	uc003ygi.3,uc003ygj.3	-1.35162	0.00155756
FMO2	uc001ghk.1,uc010pmd.1	-1.35139	0.0040828
CHD9	uc002egy.3,uc002egz.1,uc002ehb.3,uc002ehc.3,uc002ehd.2,uc002ehe.1,uc002ehf.3,uc002ehg.2,uc010cbw.3	-1.35101	5.62e-08
FER	uc003kop.1,uc003koq.2,uc011cve.1,uc011cvf.1,uc011cvg.1	-1.35041	3.98e-08
PRRX1	uc001ghe.3,uc001ghf.3	-1.34876	0.00019784
BEND6	uc003pdg.2,uc003pdi.4,uc010kab.3	-1.34853	5.38e-06
PAI1	uc022aix.1	-1.34826	2.12e-25
TBC1D15	uc001swu.3,uc001swv.3,uc001sww.3,uc009zrv.2,uc010stt.2	-1.34794	3.11e-15
KIAA1107	uc001dop.3,uc010otd.2	-1.3477	0.000841514
S1PR3	uc022bjm.1	-1.3476	2.19e-32
ERO1LB	uc001hxt.3,uc010pxt.1	-1.34678	1.52e-06
AMY2B	uc001duq.3,uc001dur.3,uc001dus.1,uc010ouo.2	-1.34672	8.17e-11
CCDC15	uc001qbm.4	-1.34561	2.08e-08
SMCHD1	uc002klk.4,uc002kll.4,uc002klm.4	-1.34438	1.13e-07
TMEM178B	uc003vwg.2	-1.34311	1.66e-14
ANXA6	uc003ltl.2,uc003lto.2,uc011dcp.2	-1.34241	1.75e-06
LOC100507053	uc003hul.2,uc003hum.2	-1.3424	0.00410157
RPAP3	uc001rpr.3,uc001rps.3,uc010slk.2	-1.34121	7.33e-08
USP45	uc003ppv.2,uc003ppw.2,uc003ppx.2,uc003pqa.3,uc010kcq.2	-1.34106	8.59e-09
LRRIQ1	uc001taa.1,uc001tac.3,uc001tad.3,uc021rbo.1	-1.34042	0.00203074
SLITRK4	uc004fbx.3,uc004fby.3,uc022cfl.1,uc022cfm.1	-1.33957	7.17e-06
UFL1	uc003por.3,uc010kck.3	-1.33757	5.64e-12
CCDC80	uc003dzf.3,uc003dzg.3,uc003dzh.1,uc011bhv.2	-1.33741	6.94e-61
CEBPZ	uc002rpz.3	-1.3371	1.62e-06
ZNF37BP	uc001jaa.4,uc001jab.4,uc001jac.4	-1.33682	3.34e-08
TTC3	uc002yvz.3,uc002ywa.3,uc002ywb.3,uc002ywc.3,uc002ywd.1,uc010gne.1,uc010gnf.3,uc011aed.1,uc011aee.1	-1.33556	8.12e-15
ZNF675	uc002nri.3	-1.33522	2.71e-12
CPED1	uc003vjq.4,uc003vjr.1,uc003vjs.4,uc003vjt.4,uc010lkk.2	-1.33483	0.00386332
7-Mar	uc002uax.3,uc002uay.3,uc010foq.3,uc010for.3,uc010zcn.2	-1.33338	4.74e-16
SERPINE1	uc003uxu.2	-1.33232	1.12e-12
AX747599	uc021upk.1	-1.33144	0.00345337
TRIM31	uc003npg.1,uc003npi.3	-1.33143	0.00293095
MNS1	uc002adr.2,uc010bfo.2	-1.33098	0.000783202
C4orf21	uc003iat.3,uc003iau.3,uc003iav.3,uc003iaw.3	-1.32976	4.87e-06
EIF5B	uc002tab.3,uc010yvq.2	-1.32753	5.19e-09
MARCKS	uc003pvy.4	-1.32729	3.16e-27
SERPING1	uc001nkp.1,uc001nkr.1,uc001nks.1,uc010rju.1,uc010rjv.1	-1.32716	0.000180171
C10orf68	uc001iwl.1,uc001iwm.1,uc001iwn.4,uc001iwo.4,uc010qei.1	-1.32617	0.00489632
SUCO	uc001giq.4,uc009wwd.3,uc010pmm.1,uc010pmn.2	-1.32589	1.4e-13
RGPD5	uc002tfe.1,uc002tht.1,uc010yxf.1,uc010yxg.2	-1.325	0.00146914
PTGS2	uc001gsb.3,uc009wyo.3	-1.32427	0.00278798
COL8A1	uc003dti.1	-1.32424	3.05e-09
PARP8	uc003jon.4,uc003joo.3,uc003jop.3,uc011cpz.2	-1.32392	2.22e-09
ARHGEF6	uc004fab.3,uc011mwd.2,uc011mwe.2	-1.32216	0.000200084
MACC1	uc003sus.4,uc010kug.3	-1.3209	3.3e-11
EFEMP2	uc001ofy.4,uc001ofz.3	-1.32034	1.25e-06
AK125699	uc001lku.1	-1.32026	6.82e-06
SLIT3	uc003mac.1,uc010jji.2	-1.31972	2.53e-06
OTUD6B	uc003yeu.4,uc011lgh.2	-1.31965	1.23e-06
BC034827	uc003xew.3	-1.31936	7.21e-05
GLIS1	uc001cvr.1	-1.3189	0.00369803
ZNF37A	uc001izk.3,uc001izl.3,uc001izm.3	-1.31881	1.66e-24
KIAA1551	uc001rks.3	-1.31874	4.88e-07
ABP1	uc003why.1	-1.31801	0.00084456
XAF1	uc002gdm.1,uc002gdn.3,uc002gdo.3,uc010clr.1	-1.31794	0.000371687
CENPQ	uc003ozh.1	-1.31743	2.54e-05
SLC16A6	uc002jgz.2,uc002jha.2	-1.31736	1.88e-05
SPEF2	uc003jjn.1,uc003jjo.3,uc003jjp.1,uc003jjq.4,uc003jjr.3	-1.31617	8.64e-06
MME	uc003fab.1,uc003fac.1,uc003fad.1,uc003fae.1,uc010hvr.1	-1.31602	2.41e-08
USP34	uc002sbd.3,uc002sbe.3,uc002sbf.3	-1.31528	2.11e-16
CARD16	uc001pio.1,uc001pip.1	-1.31434	7.04e-19
PHF3	uc003pem.2,uc003pen.2,uc003peo.3,uc003pep.1,uc010kaf.1,uc010kag.1,uc010kah.1,uc011dxs.1	-1.31397	4.95e-10
SCAMP1	uc003kfl.3,uc003kfm.3,uc003kfn.3,uc010jaa.3,uc011ctc.2,uc011ctd.2	-1.3139	2.73e-19
COL6A2	uc002zhy.1,uc002zhz.1,uc002zia.1	-1.31373	0.00535037
CLK4	uc003mjf.1,uc003mjg.1,uc003mjh.1,uc003mji.2,uc010jku.1,uc010jkv.1,uc010jkw.1,uc011dgg.1,uc011dgh.1,uc011dgi.1,uc011dgj.1	-1.31303	1.73e-13
LINC00936	uc001tbi.4	-1.31299	0.00141385
SLC38A4	uc001rpi.2,uc001rpj.2,uc009zkl.2	-1.31289	0.00517474
LOC100506124	uc021vrz.1	-1.31228	0.00536059
SLC46A3	uc001usg.3,uc001ush.3,uc001usi.3,uc001usj.3	-1.31133	4.07e-11
LEF1	uc003hyt.2,uc003hyu.2,uc003hyv.2,uc003hyw.1,uc010imb.2,uc011cfj.1,uc011cfk.2	-1.31098	0.00123972
GABRG1	uc003gxb.3	-1.31063	0.00539234
ADD3	uc001kys.4,uc001kyt.4,uc001kyu.3,uc001kyv.3,uc001kyw.3,uc001kyx.3	-1.31014	1e-13
DPYSL3	uc003lon.1,uc003loo.3	-1.31013	8.13e-05
UBA6	uc003hdg.4,uc003hdh.1,uc003hdi.3,uc003hdj.2	-1.30991	5.9e-08
GOLGA6L5	uc002bkm.2	-1.30908	0.00107801
SORBS2	uc003iya.3,uc003iyb.3,uc003iyc.3,uc003iyd.3,uc003iye.3,uc003iyf.3,uc003iyg.3,uc003iyh.3,uc003iyk.3,uc003iyl.3,uc003iym.3,uc003iyn.1,uc003iyo.1,uc011cku.2,uc011ckv.2,uc011ckw.2,uc011ckx.2,uc011cky.1	-1.30881	4.98e-39
RASEF	uc004amp.1	-1.30833	7.44e-12
PDZK1	uc001eon.2,uc001eoo.2,uc010oza.2	-1.30807	0.00255054
GGT1	uc003aan.1,uc003aas.1,uc003aat.1,uc003aau.2,uc003aav.2,uc003aaw.2,uc003aax.2,uc003aay.1	-1.30759	9.11e-05
AX746823	uc002yup.1	-1.30732	0.000438305
CCDC147	uc001kyh.3	-1.3068	0.00218531
RBSG4	uc021pei.1	-1.30639	0.0032958
AK096792	uc003ipu.1	-1.30639	0.000103163
MEG3	uc001yhw.3,uc001yhy.3,uc001yhz.3,uc001yib.3,uc001yic.3,uc001yid.2,uc001yie.3,uc010avz.2,uc010txb.2,uc010txc.2,uc010txd.2,uc010txe.2,uc010txf.2,uc010txg.2,uc010txh.2,uc021sbx.1	-1.30607	0.00427498
STXBP5-AS1	uc003qls.2,uc003qlt.2,uc003qlu.1,uc003qlv.3	-1.30345	0.000358939
LYSMD3	uc003kjr.3,uc003kjs.1,uc010jaz.2	-1.30311	3.28e-13
RPGRIP1L	uc002eho.4,uc002ehp.3,uc002ehq.1,uc010cbx.3,uc010cby.1,uc010vgy.2,uc010vgz.1	-1.3031	2.49e-08
COL7A1	uc003ctz.2	-1.30265	1.61e-16
NEK1	uc003isb.2,uc003isc.2,uc003isd.2,uc003ise.2,uc003isf.2,uc003isg.1	-1.30244	2.34e-07
ZNF845	uc010ydv.1,uc010ydw.1	-1.30209	1.27e-07
CXCL3	uc003hhl.3	-1.30109	0.000223201
PHLDB2	uc003dyc.3,uc003dyd.3,uc003dye.4,uc003dyf.4,uc003dyg.3,uc003dyh.3,uc003dyi.3,uc003dyj.3,uc010hqa.3	-1.30016	8.56e-10
KIF18A	uc001msc.2,uc001msd.3	-1.2999	6.69e-07
SNAI2	uc003xqp.3	-1.29907	1.32e-32
GOLGA8T	uc010azm.1,uc021sha.1	-1.29852	7.95e-07
CWF19L2	uc001pjh.4,uc009yxo.3,uc010rvp.2	-1.29754	2.78e-05
DOCK2	uc003maf.3,uc003mah.3,uc010jjl.1,uc010jjm.3,uc011der.2	-1.29644	1.61e-07
SP140	uc002vqj.3,uc002vqk.2,uc002vql.3,uc002vqm.3,uc002vqn.3,uc010fxl.3,uc010zma.1	-1.29606	0.00263681
RLF	uc001cfc.4,uc001cfd.4	-1.29545	1.48e-16
AK021664	uc001zwf.1	-1.29543	0.00461947
AK094117	uc001pkw.1	-1.29468	3.36e-05
CPNE8	uc001rlr.1,uc001rls.1	-1.29423	3.78e-06
SCN9A	uc002udr.1,uc002uds.1,uc002udt.1,uc010fpl.3	-1.29341	0.00609617
WBP4	uc001uxt.3,uc010tfd.2	-1.29333	7.88e-10
COPS2	uc001zxf.3,uc001zxh.3,uc010ufa.2	-1.29196	8.15e-10
LTN1	uc002ymr.2,uc010gll.1	-1.29179	3.3e-09
CWC22	uc002uno.2,uc002unp.2,uc010frh.1	-1.29144	1.2e-06
CYP39A1	uc003oyf.1,uc010jzd.1,uc011dwa.1	-1.29083	1.78e-05
IKZF2	uc002vei.3,uc002vej.3,uc002vek.3,uc002vel.3,uc002vem.3,uc002ven.3,uc010fuu.3,uc010fuv.3,uc010fuw.3,uc010fux.3,uc010fuy.3	-1.29052	2.76e-14
DDX58	uc003zra.3,uc010mji.3,uc010mjj.3,uc010mjk.1,uc011lnr.1	-1.29043	3.85e-09
STAG2	uc004etz.4,uc004eua.3,uc004eub.3,uc004euc.3,uc004eud.3,uc004eue.3	-1.29032	5.01e-11
IFLTD1	uc001rgs.2,uc009zjc.2,uc010sji.1	-1.29	0.00571859
ENPP2	uc003yor.2,uc003yos.2,uc003yot.2,uc010mdd.2,uc011lic.2	-1.28883	0.0050429
HSPA13	uc002yjt.3,uc011abx.2	-1.28777	9.29e-08
PCDHAC1	uc003lig.1,uc003lih.2	-1.28758	0.00522182
TTC14	uc003fkk.3,uc003fkl.3,uc003fkm.2	-1.28755	5.9e-05
ALMS1	uc002sje.1,uc002sjf.1,uc002sjg.3,uc002sjh.1,uc010fev.1	-1.28593	4.85e-07
RBMS3	uc003cek.3,uc003cel.3,uc003cem.3,uc010hfq.3,uc010hfr.3	-1.28553	4.51e-05
AL832439	uc002suy.1	-1.2855	2.21e-09
EMC2	uc003ymw.1	-1.28513	3.7e-15
RPS6KA2	uc003qvb.1,uc003qvc.1,uc003qvd.1,uc010kkk.1,uc010kkl.1,uc011ego.1	-1.28508	6.4e-13
MAB21L3	uc001egc.1	-1.2847	8.3e-06
PDGFRL	uc003wxr.3	-1.28447	0.00331343
TENM3	uc003ivd.1,uc003ive.1,uc010irv.1,uc021xux.1	-1.28443	5.18e-17
GMFB	uc021rtf.1	-1.28329	3.65e-09
CGB8	uc002pmb.4,uc002pmc.3	-1.28321	1.07e-06
AK091866	uc003kjy.1	-1.28141	7.92e-07
EPHA4	uc002vmq.3,uc002vmr.2,uc010zlm.1	-1.28016	2.17e-13
DZIP3	uc003dxd.3,uc003dxe.1,uc003dxf.1,uc003dxg.1,uc011bhm.2	-1.2801	5.46e-15
BMP4	uc001xal.4,uc001xan.4,uc001xao.4,uc010aoh.3	-1.27984	0.00222659
CDH13	uc002fgx.3,uc010chh.3,uc010vns.2,uc010vnt.2,uc010vnu.2,uc021tlw.1	-1.2794	3.12e-08
GJA1	uc003pyr.3,uc011ebo.1,uc011ebp.1,uc021zel.1	-1.27903	0.00681528
SYNE1	uc003qoq.4,uc003qor.4,uc003qos.4,uc003qot.4,uc003qou.4,uc003qov.3,uc003qow.3,uc003qox.1,uc003qoy.2,uc003qoz.2,uc003qpa.1,uc010kiy.1,uc010kja.2,uc010kjb.1,uc011eez.2	-1.27842	4.27e-17
MIS18BP1	uc001wwf.3,uc010anh.2	-1.27807	1.18e-05
AK022030	uc001gsy.3	-1.27774	1.42e-14
BC015429	uc001jjs.3	-1.27746	1.18e-10
PRTFDC1	uc001ise.1,uc009xkm.1,uc010qdd.1	-1.27704	0.000501323
TNPO1	uc003kcg.4,uc003kci.4,uc003kck.4,uc011csi.1,uc011csj.1	-1.27628	6.17e-10
CCDC132	uc003umn.3	-1.27517	3.42e-06
PCM1	uc003wyg.2,uc003wyh.3,uc003wyi.4,uc003wyj.4,uc003wyk.4,uc010lta.1,uc011kyh.2,uc011kyi.2,uc011kyj.2,uc011kyk.2,uc022asj.1	-1.27452	8.89e-07
POLK	uc003kdw.3,uc003kdx.3,uc003kdy.3,uc003kdz.2,uc003kea.3,uc003keb.3,uc003kec.3,uc003ked.3,uc003kee.3,uc010izq.3,uc010izr.3,uc010izs.3	-1.27401	2.12e-06
AX747062	uc003xtb.1	-1.27195	6.65e-08
USP47	uc001mjq.1,uc001mjr.3,uc001mjs.3,uc001mjt.1,uc009ygi.3	-1.27182	3.3e-12
ARRDC4	uc002bui.4,uc010bom.3	-1.27055	9.89e-22
TBC1D19	uc003gsf.4,uc010iew.3,uc011bxu.2	-1.26882	8.81e-12
ZRANB2	uc001dfs.3,uc001dft.3	-1.26793	5.29e-08
FLVCR2	uc001xrs.2,uc010tvd.1	-1.26787	4.74e-15
BC005927	uc003uxs.3	-1.26786	1.9e-10
ARAP2	uc003gso.3,uc003gsq.2,uc003gsr.1	-1.26759	2.49e-09
TCN1	uc001noj.2	-1.267	5.73e-31
AK125301	uc004ebq.1	-1.26677	1.28e-06
AB209185	uc003ydc.1	-1.26586	0.00250508
ALCAM	uc003dvv.3,uc003dvw.2,uc003dvx.3,uc003dvy.3,uc003dvz.3,uc010hpp.3,uc011bhh.1	-1.26519	2.9e-13
MUC15	uc001mqw.3,uc001mqx.3,uc001mqy.3	-1.26359	0.00637838
MCOLN3	uc001dko.3,uc001dkp.3,uc001dkq.3,uc001dkr.3,uc001dks.4	-1.26282	0.000702512
C5orf42	uc003jko.1,uc003jkp.1,uc003jkr.1,uc003jks.2,uc011coy.1,uc011coz.1,uc011cpa.1,uc011cpb.1	-1.26226	5.22e-13
PRORSD1P	uc010yoy.2	-1.26177	0.00536059
RGS7	uc001hyt.2,uc001hyu.2,uc001hyv.2,uc001hyw.2,uc009xgn.1,uc010pyh.2,uc010pyi.1,uc010pyj.1	-1.261	0.00683084
CBRC7TM_40	uc003wec.1,uc003weg.1,uc003weh.1,uc022aoh.1	-1.2608	0.00198659
METTL14	uc003icf.3	-1.26071	1.17e-09
BDP1	uc003kbn.1,uc003kbo.3,uc003kbp.1,uc003kbq.1,uc003kbr.1	-1.25954	4.78e-05
ATP8A2	uc001uqk.3,uc001uql.1,uc010aaj.1,uc010tdi.2,uc010tdj.2	-1.25933	0.00771881
GORAB	uc001ggz.4,uc001gha.2,uc001ghb.2,uc001ghc.2,uc001ghd.2,uc009wvw.2,uc009wvx.2	-1.25884	1.09e-07
C1QTNF1	uc002jwr.4,uc002jwt.3	-1.25787	1.12e-12
FKBP7	uc002umk.3,uc002uml.3,uc002umm.3,uc010zff.2	-1.2575	2.83e-18
RNF180	uc003jth.4,uc003jti.3,uc010iws.3	-1.25734	1.83e-05
PTPRQ	uc001sze.2	-1.25728	0.00688244
CENPK	uc003jts.3,uc003jtu.3	-1.25665	7.16e-08
FGF1	uc003lmq.3,uc003lmr.3,uc003lms.4,uc010jgj.3,uc011dbi.2,uc021yew.1	-1.25645	0.00766981
DCBLD2	uc003dtd.3,uc003dte.3,uc003dtf.1	-1.25608	2.48e-27
IGFL2	uc002peb.3,uc010xxv.2	-1.25509	0.000313902
PART1	uc003jsf.4,uc003jsg.2,uc021xza.1	-1.25486	0.000275727
CAPRIN2	uc001rjf.1,uc001rjg.1,uc001rjh.1,uc001rji.1,uc001rjj.1,uc001rjk.4,uc001rjl.4,uc001rjm.1,uc001rjn.1	-1.25473	1.99e-24
ARL13B	uc003drc.3,uc003drd.3,uc003dre.3,uc003drf.3,uc003drg.3,uc010hop.3	-1.25379	2.5e-06
LOC100507032	uc003enb.2	-1.25344	0.000818537
TMEM132B	uc001uhe.1,uc001uhf.1,uc021rgl.1	-1.25342	0.00493419
C1QL1	uc002ihv.3	-1.25342	0.00493419
FAM214A	uc002acf.4,uc002acg.4,uc002ach.4,uc010bfg.1,uc010ugf.2	-1.25301	4.57e-13
ERBB2IP	uc003jui.2,uc003juj.2,uc003juk.2,uc003jul.2,uc010iwx.2,uc011cqx.2,uc011cqy.2,uc011cqz.2	-1.25237	2.34e-10
ANKRD26	uc001itg.2,uc001ith.2,uc009xku.1	-1.25222	0.00100058
ZCCHC6	uc004aoq.3,uc004aor.3,uc004aos.3,uc004aot.3,uc004aou.3,uc004aov.3,uc004aow.3,uc010mqe.3,uc010mqf.2,uc011ltf.2	-1.25202	3.08e-13
NLRC3	uc010btn.3,uc010bto.1	-1.25082	0.00215703
MSANTD4	uc001piy.3,uc001piz.3	-1.25078	6.02e-13
KLF12	uc001vjf.3,uc001vjg.3,uc010aeq.3	-1.25048	2.92e-16
MIR100HG	uc001pya.3,uc009zba.2,uc009zbb.1	-1.24822	5.88e-05
SMPDL3A	uc003pzg.3,uc003pzh.3	-1.24776	1.44e-05
FAM198B	uc003ipp.4,uc003ipq.4,uc003ipr.4,uc003ips.3	-1.24543	2.67e-10
PGM5P2	uc004aff.4	-1.24483	6.63e-05
FHL1	uc004ezl.2,uc004ezm.2,uc004ezn.2,uc004ezo.3,uc004ezp.2,uc004ezq.2,uc004ezr.2,uc010nrz.2,uc011mvy.1,uc011mwa.1,uc011mwb.1,uc022ceu.1	-1.24373	7.08e-09
RFX8	uc002tbb.1,uc010yvx.1	-1.24343	0.00455569
RB1CC1	uc003xre.4,uc003xrf.4	-1.24256	3e-09
ALKBH8	uc001pjk.3,uc001pjl.3,uc009yxp.3,uc010rvq.2,uc010rvr.2	-1.24151	1.8e-08
USP32P2	uc002gty.3,uc010cqe.3,uc010cqf.3	-1.24115	2.61e-07
FOXP2	uc003vgt.2,uc003vgu.3,uc003vgv.1,uc003vgw.3,uc003vgx.2,uc003vgz.3,uc003vha.3,uc003vhb.3,uc003vhc.3,uc003vhd.3,uc003vhe.1,uc010ljz.2,uc011kmu.2,uc011kmv.2	-1.24093	0.0043646
IFT88	uc001unh.3,uc001uni.3,uc001unj.3,uc001unk.3,uc001unl.1,uc010tcq.2	-1.24063	1.4e-05
USP16	uc002ymw.3,uc002ymx.3,uc002ymy.3,uc011acm.2,uc011acn.2,uc011aco.2	-1.24053	3.76e-06
CR749668	uc003wtn.2,uc003wto.1	-1.24052	0.00851903
MIOS	uc003srf.3,uc003srg.3,uc010ktp.1,uc010ktq.3	-1.23998	6.32e-30
STK38L	uc001rhr.3,uc010sjm.2,uc010sjn.2,uc010sjo.2	-1.23895	1.45e-09
LOC653501	uc004abo.4,uc010mmh.3,uc010mmp.3	-1.23866	0.000110659
SERPINI1	uc003ffa.4,uc003ffb.4	-1.23844	0.00206687
SPINK5	uc003low.2,uc003lox.2,uc003loy.2,uc010jgq.1,uc010jgr.2,uc010jgs.1	-1.23839	0.00256207
SLC16A12	uc001kgl.3,uc001kgm.3	-1.23834	0.00154061
PGM3	uc003pju.2,uc003pjw.3,uc011dyz.2,uc021zcd.1	-1.23795	1.02e-11
UGDH	uc003guk.2,uc003gul.2,uc011byp.2	-1.23784	1.21e-35
ANKRD36C	uc002suz.1	-1.23758	0.00033791
BACH1	uc002ynj.3,uc002ynk.3,uc002ynl.2	-1.23756	3.98e-14
PRUNE2	uc004akj.4,uc004akn.3,uc010mpk.3,uc010mpl.1,uc011lsk.2,uc011lsl.2,uc011lsm.2,uc022big.1,uc022bih.1	-1.23655	3.99e-07
HMCN1	uc001grq.1,uc001grr.1,uc001grs.1	-1.2362	0.00760466
LUC7L3	uc002isp.2,uc002isq.3,uc002isr.3,uc002iss.3,uc010wmw.2	-1.23611	2.59e-06
SCOC	uc003iib.2,uc003iid.2,uc003iif.2,uc003iig.2,uc011che.1,uc011chf.1,uc011chg.1,uc011chh.1	-1.23599	1.55e-11
LOX	uc003ksu.3,uc010jcp.3,uc010jcq.3,uc010jcr.3,uc011cwk.2	-1.23591	2.48e-45
SRBD1	uc002rus.3,uc010yoc.2	-1.23518	2.44e-20
SULT1B1	uc003hen.3	-1.23505	1.38e-14
ITGA1	uc003jou.3,uc003jov.3,uc003jow.3	-1.23421	3.63e-11
GABRQ	uc004ffp.1	-1.23383	0.000223458
CDK6	uc010lez.3,uc011khw.2	-1.23236	1.63e-12
NOL8	uc004arx.3,uc022bjw.1,uc022bjx.1,uc022bjy.1	-1.23211	4.44e-06
OMD	uc004asd.4	-1.23189	0.00920839
CHIC1	uc004ebk.4,uc004ebl.4,uc010nlo.3,uc011mql.2	-1.23178	9.99e-06
BMI1	uc001irh.3	-1.23117	1.79e-08
BRIP1	uc002izk.2,uc002izl.1	-1.23015	0.00031666
CR627148	uc004aec.3	-1.22991	0.000854827
PLGLB2	uc002ssd.3,uc002ssl.3	-1.22981	0.00148395
CD274	uc003zje.3,uc011lmb.2	-1.22978	0.000210181
C12orf50	uc001tam.1,uc001tan.3	-1.22945	5.43e-15
IFIT2	uc009xts.3	-1.22837	0.00301106
BOD1L1	uc003gmz.1,uc010idr.1,uc010ids.1	-1.22827	1.94e-12
CEP152	uc001zwy.3,uc001zwz.3,uc001zxa.2	-1.228	2.05e-05
ATAD5	uc002hfs.1,uc002hft.1	-1.22778	4.22e-05
ZNF605	uc001ulh.3,uc001uli.3,uc001ulj.3,uc001ulk.1	-1.22665	1.65e-07
MECOM	uc003ffi.3,uc003ffj.3,uc003ffk.2,uc003ffl.2,uc003ffm.1,uc003ffn.3,uc010hwk.1,uc010hwn.2,uc011bpi.1,uc011bpj.1,uc011bpk.1,uc011bpl.1	-1.22521	6.76e-08
UBLCP1	uc003lxq.2	-1.22498	2e-09
MDGA1	uc003onu.1,uc003onv.1	-1.22461	0.00427725
FRY	uc001utx.3,uc001utz.3,uc010tdx.2	-1.22372	1.68e-06
STRA6	uc002axi.3,uc002axj.3,uc002axk.3,uc002axl.3,uc002axm.3,uc002axn.3,uc010bji.3,uc010bjj.1,uc010bjk.3,uc010ulh.2,uc010uli.2,uc021sqg.1	-1.22294	5.99e-13
CEP70	uc003esl.3,uc003esm.3,uc003esn.3,uc011bmk.2,uc011bml.2,uc011bmm.2	-1.22279	5.81e-06
GNRH1	uc003xem.4	-1.2225	0.000358452
HLTF	uc003ewq.1,uc003ewr.1,uc003ews.1,uc010hve.1	-1.22244	2.53e-05
ERGIC2	uc001riv.3,uc001riw.3	-1.2217	3.39e-12
LRRC40	uc001der.2	-1.22069	2.8e-05
C1orf27	uc021pgg.1,uc021pgh.1,uc021pgi.1,uc021pgj.1,uc021pgk.1,uc021pgl.1	-1.22049	1.55e-10
SMIM14	uc003guo.3,uc010ifm.3	-1.22048	1.82e-21
CUL5	uc001pju.3,uc001pjv.3	-1.22034	2.15e-09
OLAH	uc001int.2,uc001inu.2	-1.21999	2.78e-13
ADAM9	uc003xmp.3,uc003xmr.3,uc010lwr.3,uc011lcf.2,uc011lcg.2	-1.21903	3.84e-09
FAM69A	uc001dpc.3,uc001dpg.3,uc010otg.2,uc021opu.1,uc021opv.1,uc021opw.1	-1.21731	4.44e-12
GBP3	uc001dmt.3,uc001dmu.3,uc001dmv.3,uc010oss.2,uc021opp.1	-1.21724	2.31e-10
RBM41	uc004emy.2,uc004emz.3	-1.21723	5.47e-13
FBLN5	uc001xzw.3,uc001xzx.4,uc010aud.3,uc010aue.3	-1.21699	0.000410866
AK023566	uc021vrs.1	-1.21687	0.00315305
AK096291	uc001dbl.3	-1.21574	2.5e-05
ZNF182	uc004dir.3,uc004dis.3,uc004dit.3	-1.2145	1.04e-06
AK021888	uc003kor.1	-1.21441	5.7e-05
ZMIZ1-AS1	uc001jzx.3,uc001jzy.3,uc001jzz.3,uc001kab.1	-1.21429	0.00957888
DKFZP586I1420	uc003tau.3	-1.21423	7.08e-06
ARL6	uc003dru.3,uc003drv.3,uc003drw.3,uc010hoy.3	-1.21413	3.31e-05
NXNL2	uc004aqa.3,uc011ltj.2	-1.21408	0.000613386
PLAT	uc003xos.2,uc003xot.2,uc010lxf.1,uc010lxg.1,uc011lcm.1,uc011lcn.1	-1.21366	2.66e-14
DAPP1	uc003hvf.4,uc010ilh.3,uc011cek.2	-1.21246	3.06e-07
TENM2	uc003lzt.4,uc010jjd.3,uc010jje.3,uc021yhi.1	-1.21213	0.00999569
ODF2L	uc001dll.2,uc001dlm.2,uc001dlp.3,uc001dlq.2,uc009wcr.2,uc010osg.2,uc021opg.1	-1.21015	1.43e-06
SMC2	uc004bbu.1,uc004bbv.3,uc004bbw.3,uc004bbx.3,uc004bby.3,uc010mtg.1,uc010mth.1,uc011lvl.2	-1.2097	4.18e-05
UTRN	uc003qkt.3,uc010khq.1	-1.20901	5.29e-17
SMARCA4	uc002mqe.2,uc002mqf.4,uc002mqg.1,uc002mqh.4,uc002mqi.1,uc002mqj.4,uc010dxo.3,uc010dxp.3,uc010dxq.3,uc010dxr.3,uc010dxs.3,uc010dxt.1	-1.20806	8.48e-73
ZNF432	uc002pyk.3	-1.20763	6.17e-09
CCDC176	uc001xpm.1,uc010tup.2	-1.20744	4.61e-05
HNRNPH2	uc004ehm.3,uc004ehn.3,uc022cai.1	-1.20727	1.54e-07
MTERF	uc003ulc.1,uc010let.1,uc010leu.1,uc011khm.1	-1.20594	3.85e-09
CERCAM	uc004buy.1,uc004buz.4,uc010mxz.3,uc010mya.1	-1.20576	0.00013863
KATNAL2	uc002lco.3,uc010dnq.1	-1.2054	0.00102166
AK090674	uc002ist.1	-1.20507	0.000490777
DIS3	uc001vix.4,uc001viy.4,uc001viz.3	-1.20436	3.2e-08
AK095112	uc002ivg.1	-1.20395	1.61e-07
SLC3A1	uc002rty.3,uc002rtz.2,uc002rua.3,uc002rub.2,uc002ruc.4,uc002rud.4,uc002rue.4	-1.20377	0.000755262
HNF4G	uc003yap.1,uc003yaq.3,uc003yar.3	-1.2035	0.00759957
IPO11-LRRC70	uc003jte.3	-1.20307	0.00817634
BC070495	uc003gnd.4	-1.20286	7.39e-10
HSD17B11	uc003hqp.2	-1.20284	2.31e-08
NHS	uc004cxx.3,uc004cxy.3,uc004cxz.3,uc004cya.3,uc011mix.2	-1.20276	2.79e-07
CALU	uc003vnq.3,uc003vnr.3,uc003vns.3,uc022ald.1,uc022ale.1,uc022alg.1,uc022alh.1,uc022ali.1	-1.20165	8.1e-28
SNORA8	uc009ywe.3	-1.20109	0.0001011
CLHC1	uc002ryh.2,uc002ryi.2,uc002ryj.2	-1.20077	4.14e-06
FKBP10	uc002hxv.2,uc002hxw.1	-1.20014	0.00337389
SMARCAD1	uc003htb.4,uc003htc.4,uc003htd.4,uc010ila.3,uc011cdw.2	-1.19978	2.49e-07
TSPAN5	uc003hub.3,uc011cdz.2	-1.199	0.000142814
ZNF300	uc021yfx.1,uc021yfy.1,uc021yfz.1	-1.1988	7.65e-07
TCF4	uc002lfw.4,uc002lfx.2,uc002lfy.2,uc002lfz.2,uc002lga.3,uc002lgc.4,uc010dph.1,uc010dpi.3,uc010xdu.1,uc010xdv.1,uc010xdw.1,uc010xdx.1,uc010xdy.1,uc021ukg.1,uc021ukh.1,uc021uki.1,uc021ukj.1,uc021ukk.1,uc021ukl.1,uc021ukm.1,uc021ukp.1	-1.19791	6.18e-14
ZNF229	uc002oze.1,uc010ejk.1,uc010ejl.1	-1.1976	2.8e-09
AHI1	uc003qgf.3,uc003qgg.3,uc003qgh.3,uc003qgi.3,uc003qgj.3,uc003qgk.4,uc003qgl.3	-1.19647	2.07e-06
TEX9	uc002adp.3,uc002adq.1,uc010ugl.2	-1.19567	0.000409467
G2E3	uc001wqk.2,uc001wql.1,uc010tpe.1,uc010tpf.1	-1.1954	1.58e-06
LINC00883	uc003dwg.4,uc010hpq.3	-1.19473	1.32e-08
MORC3	uc002yvi.3	-1.19295	8.53e-10
RBPJ	uc003grx.2,uc003gry.2,uc003grz.2,uc003gsa.2,uc003gsb.2,uc011bxt.2	-1.19259	2.62e-12
ROCK1	uc002kte.3	-1.19236	1.19e-09
ZNF136	uc002mti.3,uc010xmh.2	-1.19196	7.81e-06
FIBIN	uc001mrd.3	-1.19136	7.56e-07
ZNF568	uc002ofc.3,uc002ofd.3,uc010efe.3,uc010efg.3,uc010efi.2,uc010efj.2,uc010xtn.2,uc021uts.1	-1.19129	0.00243312
KIF14	uc010ppj.1,uc010ppk.1	-1.18953	8.78e-06
FLJ23584	uc021wqg.1	-1.18923	8.96e-06
USO1	uc003hiu.3,uc003hiv.3,uc003hiw.3	-1.18905	2.66e-12
AX748249	uc003gsx.4	-1.18892	0.000162681
CTSO	uc003ipg.3	-1.18867	3.62e-07
TBK1	uc001ssc.2	-1.18856	3.58e-07
GEN1	uc002rct.2,uc002rcu.2,uc010yjs.1	-1.1883	9.52e-08
BC037833	uc004bya.1	-1.18764	0.00356162
EXOC5	uc001xcs.3,uc001xct.3,uc010trg.2,uc010trh.2	-1.18679	4.04e-07
MMP19	uc001sia.3	-1.18638	1.13e-07
ENPP4	uc003oxy.3	-1.1853	0.00160613
HDAC9	uc003sua.1,uc003sub.4,uc003sud.2,uc003sue.3,uc003suf.2,uc003suh.3,uc003sui.3,uc003suj.3,uc003suk.3,uc010kud.2,uc010kue.1,uc011jya.2,uc011jyb.2,uc011jyc.2,uc011jyd.2,uc011jye.2,uc011jyf.2	-1.18407	3.31e-06
ZC3H12C	uc001pkq.2,uc001pkr.4,uc009yxw.3,uc010rwc.2,uc010rwd.2	-1.18397	4.93e-09
CES4A	uc002eqv.3,uc002eqw.3,uc002eqx.3,uc002eqy.3,uc010vix.2,uc010viy.2	-1.18309	8.52e-06
EHF	uc001mvr.2,uc009yke.2,uc009ykf.2,uc021qfu.1	-1.18291	3.13e-33
RASSF8-AS1	uc001rgu.1,uc001rgv.4,uc021qwf.1	-1.18286	1.6e-05
KIDINS220	uc002qzb.2,uc002qzc.2,uc002qzd.2,uc002qze.3,uc010yiv.1,uc010yiw.1	-1.18237	5.81e-19
DEPDC7	uc001mub.3,uc001muc.3,uc010reg.1,uc010reh.1	-1.18192	0.00033079
ZC2HC1A	uc003ybd.3	-1.18121	3.28e-07
LRRC2	uc003cpu.4,uc010hji.3	-1.1811	0.00504681
SYT11	uc001fmg.3,uc010pgq.2	-1.18066	1.92e-06
OXR1	uc003ymf.3,uc003ymg.1,uc003ymi.1,uc003ymk.3,uc003yml.3,uc010mcg.3,uc010mch.3,uc011lht.2,uc011lhu.2,uc022azp.1	-1.17997	2.08e-09
ZNF585B	uc002ofq.3,uc002ofr.1	-1.17941	0.000161223
DOPEY1	uc003pjs.1,uc003pjt.3,uc010kbl.1,uc011dyy.2	-1.17846	2.22e-12
C1GALT1	uc010ktm.1,uc010kto.2	-1.17843	6.83e-21
SMC6	uc002rcn.3,uc002rco.3,uc002rcp.1,uc002rcq.2,uc002rcr.1,uc010exo.3	-1.17778	1.32e-05
IVL	uc001fau.3,uc021ozl.1	-1.176	0.000234675
POT1	uc003vlk.3,uc003vll.3,uc003vlm.3,uc003vln.3,uc003vlo.3,uc011koe.2	-1.17415	3.43e-06
AK094621	uc003jka.1	-1.17391	1.11e-08
FAM13B	uc003lbz.2,uc003lca.2,uc003lcb.2	-1.17365	8.73e-07
RGS2	uc001gsl.3	-1.17261	7.69e-12
KIAA1524	uc003dxb.4,uc003dxc.1,uc010hpv.1,uc010hpw.1	-1.1725	5.06e-06
ZNF25	uc001ize.1,uc001izf.1	-1.17193	6.61e-06
ZNF12	uc003sqs.1,uc003sqt.1,uc011jxa.1	-1.17068	1.09e-08
LOC286437	uc004elv.2	-1.1706	1.35e-05
SNX16	uc003ycn.3,uc003yco.3,uc011lft.2	-1.1696	1.27e-11
ING3	uc003vjl.3,uc003vjm.1,uc003vjn.3,uc003vjo.3,uc003vjp.3,uc011knr.1,uc011kns.2	-1.16952	6.55e-14
ANKRD32	uc003kkr.4,uc003kks.3,uc011cul.1	-1.16932	4.93e-07
TROVE2	uc001gss.3,uc001gsu.2,uc001gsv.2,uc001gsw.3,uc001gsx.2,uc009wyp.3,uc009wyq.3	-1.16927	6.04e-08
SASS6	uc001dsu.3,uc009wdz.3	-1.16903	2.51e-06
PAPSS2	uc001kew.3,uc001kex.3,uc009xtg.1	-1.16856	2.06e-08
THSD1	uc001vgo.3,uc001vgp.3,uc010tgz.2	-1.1683	0.000718834
SORCS3	uc001kyi.1,uc010qqz.1	-1.16818	2.63e-11
TMEM45A	uc003dtz.1,uc003dua.1,uc003dub.1	-1.16779	1.14e-21
FBXO30	uc003qla.3	-1.16775	4.4e-14
ARHGEF38	uc003hxu.3,uc003hxv.2	-1.16743	0.000217703
AK022915	uc001iqe.3	-1.16723	6.7e-09
LOC441666	uc010qey.2	-1.16699	0.00409204
IGIP	uc003lfb.1	-1.16631	1.48e-12
HSD11B1	uc001hhj.3,uc001hhk.3,uc021pin.1	-1.16623	6.07e-05
KIF5B	uc001iwe.4	-1.1661	2.08e-07
ZNF284	uc002oyg.1,uc010ejd.2	-1.16556	2e-05
KLRAP1	uc009zhn.3,uc009zho.3,uc010shf.2,uc010shg.2	-1.16502	0.00808772
TRIM36	uc003kqs.3,uc003kqt.3,uc003kqu.2,uc003kqv.3,uc011cwc.2	-1.16359	6.92e-05
FAM102B	uc010ouy.2	-1.16329	1.46e-08
ROCK2	uc002rbd.1	-1.16054	1.28e-06
PREX1	uc002xtv.1,uc002xtw.1	-1.16046	0.00514054
PTAR1	uc004ahi.3,uc004ahj.4	-1.16027	4.64e-08
S1PR1	uc001dud.2,uc009weg.2,uc021oqt.1	-1.15981	0.00345396
ABCA10	uc002jhz.3,uc010dfa.1,uc010dfb.1,uc010dfc.1,uc010wqs.1,uc010wqt.1	-1.15946	0.00097596
ZNF765	uc002qbm.3,uc002qbn.3,uc010ydx.2	-1.15864	3.47e-06
GALNT1	uc002kyz.4,uc002kza.2,uc002kzb.3,uc010dmu.3	-1.15827	1.22e-08
COL1A2	uc003ung.1,uc010lfh.1,uc010lfi.1,uc011kib.1,uc022ahm.1	-1.15804	0.00128881
ZNF480	uc002pyv.3,uc010epn.3,uc010ydl.2,uc010ydm.2	-1.15781	2.01e-07
ZNF302	uc002nvp.1,uc002nvq.1,uc002nvr.1,uc002nvs.1,uc010xrz.1	-1.1575	0.000803781
AK093416	uc003igh.1	-1.15725	0.00840065
PNN	uc001wuw.4	-1.15627	1.5e-05
CPA4	uc003vpr.3,uc011kpd.2,uc011kpe.2	-1.15551	6.18e-63
LRP1	uc001snb.3,uc001snc.1,uc001snd.3,uc009zph.1,uc009zpi.1,uc010sre.2	-1.15538	4.24e-06
HTRA1	uc001lgj.2	-1.15525	5.19e-06
M55536	uc003lzy.3	-1.15462	8.87e-08
SLC14A1	uc002lbf.4,uc002lbg.4,uc002lbh.4,uc002lbi.4,uc002lbj.4,uc002lbk.4,uc010dnk.3,uc010xcn.2,uc010xco.2,uc021ujg.1	-1.15407	0.00269956
SGMS2	uc003hyl.4,uc003hyn.3,uc003hyo.3	-1.15372	5.75e-08
UNC5B-AS1	uc021psk.1	-1.1533	0.00254432
GOLGA8A	uc001zih.3,uc001zii.3	-1.15298	2.13e-09
CYP19A1	uc001zyz.4,uc001zza.4,uc001zzb.2,uc001zzc.1,uc001zzd.3,uc001zze.2,uc010bey.1	-1.15277	0.00572092
FGF2	uc003iev.1	-1.15182	0.000127018
EPHB2	uc001bge.3,uc001bgf.3,uc009vqj.1,uc010odu.2	-1.15153	0.000120349
ZNF28	uc002qac.3,uc002qad.3,uc010eqe.3	-1.15115	0.000211542
ZNF221	uc002oxx.2,uc010ejb.1,uc010xws.1	-1.15029	0.00127455
GDA	uc004aiq.3,uc004air.3,uc004ais.3,uc004ait.1,uc010mow.2,uc011lse.2,uc011lsf.2	-1.14922	8.25e-10
ZNF160	uc002qaq.4,uc002qar.4,uc002qas.4,uc010eqk.3	-1.1485	3.84e-09
PCMTD1	uc003xqx.4,uc010lya.3,uc011ldm.2,uc011ldn.2,uc011ldo.1	-1.14753	2.54e-06
AXL	uc010ehi.1,uc010ehj.3,uc010ehk.3	-1.14527	4.32e-09
ASAH2B	uc010qhm.2	-1.14461	0.000867705
STYK1	uc001qys.2	-1.1444	0.00538689
ZFP37	uc004bgm.1,uc011lwz.1,uc011lxa.1	-1.14414	0.00304848
LYST	uc009xga.1	-1.1428	0.00435035
PPP1R9A	uc003unp.3,uc003unq.3,uc003unr.3,uc010lfj.3,uc011kif.2,uc011kig.2	-1.14265	2.06e-07
SETX	uc004cbj.3,uc004cbk.3,uc010mzt.3	-1.14218	2.74e-09
CLK1	uc002uwe.2,uc002uwf.2,uc002uwg.2,uc010zhi.1	-1.14202	2.81e-07
ABCG2	uc003hrf.3,uc003hrg.3,uc003hrh.3,uc003hri.1,uc003hrj.1,uc003hrk.1	-1.14185	2.22e-05
NME5	uc003lce.3	-1.1416	0.00919541
TRIM46	uc009wpe.1,uc009wpf.2,uc009wpg.1	-1.1413	0.00750977
RBAK	uc003sns.1,uc010kss.1	-1.14102	9.55e-06
PDS5B	uc001uun.3,uc001uuo.3,uc010abf.3,uc010abg.3,uc010teb.2	-1.14065	3.25e-10
COL16A1	uc001btj.1,uc001btk.1,uc001btl.4	-1.13992	0.000109391
AK311113	uc010fca.1	-1.13984	3.04e-11
PLK2	uc003jrn.3,uc011cql.1,uc021xyx.1	-1.13839	5.26e-14
TM6SF1	uc002bjp.3,uc002bjq.3,uc002bjr.3,uc010bmq.3,uc010bmr.3	-1.13837	0.000640955
TCEAL1	uc004eks.3,uc004ekt.3,uc004eku.3,uc022cbv.1	-1.13817	3.83e-13
AL831889	uc001byq.3	-1.13814	1.93e-07
SLK	uc001kxo.1,uc001kxp.1	-1.13807	3.68e-06
NBEAL1	uc002uzq.3,uc002uzt.3,uc002uzu.3,uc010zid.1,uc010zie.1,uc021vvj.1	-1.13785	1.18e-15
ZNF224	uc002oyh.2	-1.13679	6.46e-07
GRB10	uc003tph.3,uc003tpi.2,uc003tpj.2,uc003tpk.2,uc003tpl.2,uc003tpm.2,uc010kzb.2	-1.13678	9.08e-28
DENND1B	uc001gue.3,uc001guf.3,uc001gug.4,uc010ppf.2,uc021pgu.1,uc021pgv.1	-1.13623	4.64e-07
TMX3	uc002lkf.3,uc002lkg.4,uc010xez.2,uc010xfa.1	-1.13602	2.47e-08
HBEGF	uc003lfi.3,uc010jfj.3	-1.13562	8.25e-13
SCRN3	uc002uiq.3,uc002uir.1,uc002uis.3,uc010zen.2,uc010zeo.2	-1.13448	1.11e-07
ANKRD29	uc002kun.3,uc002kuo.3	-1.13411	0.00120652
RAPGEF6	uc003kvm.2,uc003kvn.2,uc003kvo.2,uc003kvp.2,uc003kvq.3,uc003kvr.3,uc010jdi.2,uc010jdj.2,uc010jdk.3,uc011cxe.2	-1.13388	4.93e-08
MAP3K2	uc002toj.2	-1.13384	2.13e-11
BBS10	uc001syd.1	-1.13354	2.1e-08
C6orf211	uc003qok.1,uc011ees.1	-1.1335	3.36e-11
AK090844	uc001ctg.1	-1.13321	0.00186036
ZNF280D	uc002adt.3,uc002adu.3,uc002adv.3,uc002adw.1,uc002adx.3,uc002ady.3,uc010bfp.3,uc010bfq.3,uc010bfr.1	-1.1331	1.63e-06
TGFBI	uc003lbf.4,uc003lbg.4,uc003lbh.4,uc010jee.3,uc011cyb.2	-1.13216	8.15e-07
ANGPTL4	uc002mjq.1,uc002mjr.1,uc010xkc.1	-1.13209	9.42e-48
IFT74	uc003zqf.4,uc003zqg.4,uc010mja.3,uc010mjb.3	-1.13203	8.95e-05
GRIK2	uc003pqn.3,uc003pqo.4,uc003pqp.4,uc010kcw.3,uc021zdi.1,uc021zdj.1,uc021zdk.1,uc021zdl.1	-1.12983	1.14e-13
BCAP29	uc003vej.2,uc011kly.1,uc011kma.1	-1.12959	2.37e-08
KIAA2026	uc003zjq.4,uc010mht.3	-1.12948	6.73e-09
KIF3A	uc003kxm.3,uc003kxn.3,uc003kxo.3,uc003kxp.3,uc011cxf.2	-1.12879	8.96e-14
EHD3	uc002rnu.3,uc010ymt.2	-1.12831	1.04e-05
TP53AIP1	uc001qex.3,uc001qey.3,uc009zcm.2,uc021qsc.1,uc021qsd.1,uc021qse.1	-1.12827	0.000965714
LAGE3	uc004fln.1	-1.1265	1.18e-09
RUFY2	uc001joa.3,uc001job.3,uc001joc.3,uc001joe.1,uc009xpv.1,uc010qiw.2	-1.12635	2.79e-09
EFCAB13	uc002ill.1,uc002ilm.3,uc002iln.3,uc010daz.1	-1.12504	0.00931982
FAM35A	uc001kei.4,uc001kej.4	-1.1249	3.53e-10
SLFN5	uc002hje.3,uc002hjf.4,uc010wcg.2	-1.12476	4.83e-28
ZNF699	uc002mlc.1	-1.12453	1.16e-05
ATL1	uc001wyd.4,uc001wye.4,uc001wyf.4,uc021rsw.1,uc021rsx.1	-1.12436	0.0040968
BC090058	uc003ufr.3	-1.12433	0.00645282
ARL5B	uc001iqd.1	-1.12417	6.47e-13
SMC5	uc004ahr.2,uc011lry.1	-1.12411	7.26e-05
ARID4B	uc001hwp.3,uc001hwq.3,uc001hwr.3,uc001hws.4,uc001hwt.4,uc001hwu.1,uc021pks.1	-1.12372	2.04e-05
CXCL2	uc003hhm.4	-1.12324	2.64e-05
SERINC1	uc003pyy.1	-1.12214	7.17e-36
C12orf75	uc001tlh.4	-1.1213	2.41e-24
MLF1IP	uc003iwp.3,uc003iwq.3,uc003iwr.1	-1.11922	3.21e-08
ATF3	uc001hjf.3,uc001hjh.3,uc001hji.3,uc001hjj.3,uc021pit.1,uc021piu.1,uc021piv.1	-1.11908	0.000348068
ICAM2	uc002jdu.4,uc002jdv.4,uc002jdw.4,uc002jdx.4,uc010ded.3,uc010wpx.1	-1.1187	0.00784
AK025511	uc021rmp.1	-1.11824	0.00638443
ZNF502	uc003cns.3,uc003cnt.3,uc011baa.2,uc011bab.2	-1.11796	0.00517287
U2SURP	uc003evh.1,uc003evi.1,uc003evj.1,uc003evk.1,uc003evl.1,uc011bnj.1	-1.11773	5.41e-05
AK128593	uc021xpq.1	-1.11715	2.71e-05
FABP4	uc003ycd.2	-1.11669	1.09e-08
STXBP5	uc003qly.3,uc003qlz.3,uc010khz.2	-1.11613	4.93e-15
NIPBL	uc003jkk.4,uc003jkl.4,uc003jkm.1,uc003jkn.3	-1.11502	3.29e-09
ZNF681	uc002nrj.4,uc002nrk.4,uc002nrl.4,uc002nrm.1	-1.11429	2.26e-06
TTC33	uc003jma.3,uc010ivg.3,uc011cpm.2	-1.11417	6.33e-05
TMEM45B	uc001qfe.1,uc001qff.1	-1.11412	6.59e-11
RAD50	uc003kxg.1,uc003kxh.3,uc003kxi.3	-1.11399	4.01e-06
AK096335	uc001nkt.1	-1.11372	0.00411758
AK001394	uc003iwb.1	-1.11321	0.000656323
CADM3	uc001ftk.2,uc001ftl.2,uc009wsx.1,uc009wsy.1	-1.11241	8.52e-06
TMEM255B	uc001vuh.3,uc010tkh.2	-1.11229	1.77e-06
AK095366	uc003eda.1,uc003edb.1	-1.11206	0.00816741
DQ593252	uc001nxj.1	-1.11195	2.68e-11
WDR89	uc021ruf.1	-1.11145	3.03e-06
CREB1	uc002vcc.3,uc002vcd.3,uc010ziz.1,uc010zja.1	-1.11129	5.71e-07
AK125311	uc003tnu.1	-1.111	0.00546993
ELMOD2	uc003iik.3	-1.1108	9.31e-06
PON2	uc003unu.3,uc003unv.3,uc003unw.3,uc010lfk.3	-1.11056	4.49e-16
ZNF100	uc002nqh.3,uc002nqi.3	-1.10993	1e-08
BC022047	uc003pyw.1	-1.10895	0.000220313
C5AR1	uc002pgj.1	-1.10763	0.0032901
TNFRSF11B	uc003yon.4,uc010mdc.1	-1.10589	0.00395296
SACS	uc001uop.1,uc001uoq.1	-1.10583	1.44e-08
FAM127A	uc004eyd.3	-1.1051	9.38e-39
LINC00589	uc003xhn.3	-1.10427	0.0099293
NARG2	uc002agq.4,uc002agr.1	-1.10343	1.54e-16
SNX13	uc003stv.3,uc003stw.1,uc003stx.1,uc003sty.3,uc010kub.3,uc010kuc.3	-1.10307	6.62e-12
INSIG2	uc002tlk.3,uc002tll.3,uc010yye.2	-1.10297	1.12e-09
TRMT10C	uc021xbw.1	-1.1029	2.86e-06
MB21D2	uc011bsp.2	-1.10259	0.000379482
NR1D2	uc003ccs.2,uc010hfd.2,uc011awk.1	-1.10238	3.85e-21
AK124194	uc002yli.1	-1.10221	1.61e-05
XRN1	uc003eus.3,uc003eut.3,uc003euu.3,uc003euv.1,uc003euw.3,uc010huu.3,uc011bnh.2	-1.10134	3.52e-07
ANKRD20A8P	uc010fhp.3,uc010fhq.2	-1.10098	6.51e-05
ZNF430	uc002npj.3,uc002npk.3	-1.09967	9.23e-07
ATP6V1C2	uc002ras.3,uc002rat.3	-1.09967	0.0055863
ATP8B2	uc001few.3,uc001fex.3,uc001fey.1	-1.09939	4.92e-07
AK096592	uc001xqo.1	-1.09931	0.00038319
BIN1	uc002tns.2,uc002tnt.2,uc002tnu.2,uc002tnv.2,uc002tnw.2,uc002tnx.2,uc002tny.2,uc002tnz.2,uc002toa.2,uc002tob.2,uc002toc.2,uc010yzf.2,uc010yzg.2	-1.09857	2.37e-06
CEP55	uc001kiq.4,uc009xug.3	-1.09783	4.56e-05
BRSK1	uc002qkf.3,uc002qkg.3,uc002qkh.3,uc021vbs.1	-1.09627	0.000113284
HAUS6	uc003znl.1,uc003znm.1	-1.0962	7.15e-05
EMB	uc003jol.3,uc003jom.3,uc010ivq.3,uc011cpy.2	-1.0961	5.18e-07
THAP9-AS1	uc003hnq.3,uc021xpo.1,uc021xpp.1	-1.09571	4.87e-07
KIF21A	uc001rlt.3,uc001rlu.3,uc001rlv.3,uc001rlw.3,uc001rlx.3,uc001rly.3,uc001rlz.3,uc010skl.2	-1.09553	1.34e-07
ITGA2	uc003joy.3,uc011cqa.2,uc011cqb.2,uc011cqc.2,uc011cqd.2,uc011cqe.2	-1.09526	3.54e-18
ATR	uc003eux.4,uc003euy.1	-1.09516	1.72e-08
ZC3H15	uc002upo.3	-1.09449	1.73e-07
JRKL	uc001pfy.2	-1.0944	9.88e-06
ARHGAP29	uc001dqj.4,uc001dqk.3,uc001dql.3,uc009wdq.1	-1.0944	1.89e-06
ZMYM2	uc001umq.3,uc001umr.3,uc001ums.3,uc001umt.3,uc001umv.3,uc001umw.3,uc010tco.1,uc021rgy.1	-1.09382	2.68e-13
CASC5	uc001zme.3,uc010bbs.1,uc010bbt.1,uc010ucq.1	-1.09356	1.71e-05
TRIM2	uc003ing.2,uc003inh.2,uc003ini.1	-1.09329	3.36e-05
ANKRD36	uc002sxn.2,uc002sxo.2,uc002sxp.3,uc002sxq.2,uc002sxr.1,uc002sxt.1,uc010fic.2,uc010yuz.1,uc010yva.2,uc021vlk.1	-1.09244	0.000382488
NXPE3	uc003dvn.3,uc010hpn.3	-1.09168	4.03e-17
AKAP11	uc001uys.2	-1.09155	2.05e-08
ATP11C	uc004fax.3,uc004fay.3,uc004faz.3,uc004fba.3	-1.09154	1.82e-08
SPATA18	uc003gzk.1,uc003gzl.3,uc010igl.1,uc011bzq.2	-1.09082	5.89e-13
ARID4A	uc001xdo.3,uc001xdp.3,uc001xdq.3,uc010apf.1,uc010apg.1	-1.09066	1.99e-05
KIAA0825	uc003kkn.3,uc003kkp.2,uc011cuk.2	-1.09003	9.42e-05
CCNL1	uc003fbd.1,uc003fbe.3,uc003fbf.3,uc003fbg.3,uc003fbi.1,uc011bor.2	-1.09002	2.63e-07
C5orf54	uc003lye.1,uc003lyf.1,uc021yhc.1	-1.08945	2.2e-07
ZNF23	uc002fad.3,uc002faf.3,uc002fag.3,uc002fah.3,uc002fai.3,uc010vmf.2	-1.08945	0.000194872
DNAJC22	uc001rua.3,uc001rub.3	-1.08896	0.000633359
CKAP2L	uc002tie.2,uc002tif.2,uc010yxp.1,uc010yxq.1	-1.08863	1.62e-08
DYNAP	uc002lfq.1	-1.08716	0.00523105
FAM76B	uc001pfm.2,uc001pfn.2	-1.0866	4.15e-05
ATP8A1	uc003gwq.2,uc003gwr.2,uc003gws.2,uc011byz.1	-1.08545	0.00411347
USP8	uc001zyk.1,uc001zyl.4,uc001zym.4,uc001zyn.4,uc001zyp.4,uc010bev.1,uc010ufh.2	-1.08535	1.64e-06
CR627206	uc002wsk.1	-1.08451	2.54e-05
AK123332	uc021tec.1	-1.08443	0.00102571
COL6A3	uc002vwj.2,uc002vwl.2,uc002vwo.2,uc002vwp.1,uc002vwq.3,uc002vwr.3,uc010znj.1,uc010znk.1	-1.08428	8.77e-05
ZC3H13	uc001vaq.2,uc001vas.1,uc001vat.1,uc010tfw.1	-1.08386	2.45e-07
ZBTB6	uc022bnb.1	-1.0837	4.6e-06
DHX36	uc003ezy.4,uc003ezz.4,uc010hvq.3	-1.0837	3.88e-09
VAMP4	uc001ghv.2,uc001ghw.2,uc001ghx.2,uc001ghy.2	-1.08326	9.28e-11
ATP7A	uc004ecv.2,uc004ecw.2,uc004ecx.4	-1.0826	8.19e-14
WDHD1	uc001xbm.2,uc001xbn.2,uc010aom.2	-1.08242	0.000298444
AKAP6	uc001wrq.3,uc010aml.3	-1.08231	0.00042076
CAMSAP2	uc001gvk.3,uc001gvl.3,uc001gvm.3	-1.08212	2.18e-09
LINC00670	uc002gnl.2,uc002gnm.2	-1.08132	0.00931653
BNIP3L	uc003xex.1,uc003xey.2,uc010luh.1,uc010lui.1	-1.08128	3.8e-21
OXTR	uc003brc.3	-1.08048	0.000798206
PCNXL4	uc001xeq.2,uc001xer.4,uc010apm.3	-1.07958	7.29e-08
GABPA	uc002ylx.4,uc002yly.4	-1.07869	5.55e-07
DIO2	uc001xut.3,uc010asx.3,uc010asy.3,uc021rxa.1,uc021rxb.1	-1.0782	0.00448818
CPEB4	uc003mcs.4,uc003mcu.4,uc010jju.2,uc010jjv.3,uc011dfg.2,uc021yhy.1	-1.07757	1.58e-08
PECAM1	uc002jef.2	-1.07734	7.44e-12
BBS7	uc003ied.3,uc003iee.2,uc010inq.1	-1.0765	4.1e-07
TTC18	uc001jtv.4,uc001jtw.4,uc001jtx.3,uc001jty.3,uc009xrc.3,uc009xrd.1	-1.0763	0.0061443
RGL1	uc001gqm.3,uc001gqo.3,uc010pof.1,uc010pog.2,uc010poh.2,uc010poi.2	-1.07558	5.41e-05
FAM73A	uc001dhy.1	-1.07555	0.000363561
GOLGA8B	uc001zip.3,uc001ziq.3,uc010ucf.2	-1.07496	1.58e-07
AX747067	uc002vga.1	-1.07453	2.24e-07
ZZZ3	uc001dhp.3,uc001dhq.3,uc001dhr.3,uc009wbz.1	-1.07446	3.92e-06
NPHP3-ACAD11	uc003eoz.1,uc011blr.1	-1.0743	0.000722925
C12orf36	uc001rbs.2	-1.07383	6e-09
C12orf4	uc001qms.3,uc001qmt.3	-1.07364	5.53e-06
AK096475	uc001mmy.1	-1.07316	0.00212998
NR2F1-AS1	uc003kkc.2,uc003kkd.2,uc003kke.2,uc003kkf.2,uc003kkg.2,uc003kkh.2,uc003kki.2,uc010jbb.1,uc010jbc.2,uc011cud.1,uc011cue.1	-1.07278	1.29e-05
NEK7	uc001gun.4,uc021pgx.1	-1.07256	2.23e-05
ZNF583	uc002qnc.2,uc010ygl.1,uc010ygm.1	-1.07252	0.00858004
CA8	uc003xtz.1,uc003xua.1,uc003xub.3	-1.07222	0.000722822
NRP1	uc001iwv.4,uc001iww.4,uc001iwx.4,uc001iwy.4,uc001iwz.2,uc001ixa.2,uc001ixb.2,uc001ixc.1,uc009xlz.3	-1.07202	4.63e-22
TMEM2	uc004aik.2,uc010mos.2,uc011lrz.1,uc011lsa.1,uc011lsb.1	-1.07197	3.58e-24
FRMD4A	uc001ims.3,uc001imt.1,uc001imu.1,uc001imv.3,uc001imw.1,uc009xjf.1	-1.0714	0.00103559
MPP7	uc001iua.1,uc001iub.1,uc009xkz.1,uc009xla.2,uc010qdv.1	-1.07082	1.12e-06
ELAVL2	uc003zps.3,uc003zpt.3,uc003zpu.3,uc003zpv.3,uc003zpw.3	-1.06949	0.000240268
AHRR	uc003jav.3,uc003jaw.3,uc003jax.3,uc003jay.3,uc003jaz.3,uc010isy.3,uc010isz.3	-1.06941	0.00115647
TRDMT1	uc001iop.3,uc001ios.3,uc009xjs.1,uc009xjt.3,uc009xju.1,uc010qcc.1,uc010qcd.2,uc021pnn.1,uc021pno.1	-1.06856	0.00200834
SLC25A36	uc003etp.3,uc003etq.2,uc003etr.2,uc003ets.2,uc011bmz.1	-1.06808	1.29e-09
HMGN5	uc004eee.1	-1.06788	2.74e-05
RNF6	uc001uqn.1,uc001uqo.3,uc001uqp.3,uc001uqq.3,uc010tdk.2	-1.0678	1.38e-06
ZNF596	uc003wot.3,uc003wou.3,uc003wov.3,uc003wow.3	-1.06758	0.00911269
TRNT1	uc003bpk.2,uc003bpm.2,uc003bpn.1,uc003bpo.1,uc003bpp.4,uc010hbv.3	-1.06705	1.55e-08
G0S2	uc001hhi.4,uc021pim.1	-1.06691	0.000987114
DEK	uc003ncr.1,uc011djf.1,uc011djg.1	-1.06688	8.86e-06
CCDC144A	uc002gqk.1,uc002gql.1	-1.06668	0.00166103
KRR1	uc001sxt.3,uc009zsc.3,uc010stx.2	-1.06644	0.000215213
TWF1	uc001rob.3,uc001roc.3	-1.06548	5.07e-06
ZNF800	uc003vlw.1,uc003vlx.1,uc003vly.1,uc010lla.2	-1.06537	6.68e-12
SRFBP1	uc003kst.1	-1.06513	0.00225652
LINC00641	uc001vzu.2,uc021rov.1	-1.06388	9.04e-14
SCAF11	uc001row.3,uc001rox.3,uc001roy.1,uc001roz.3,uc009zki.1	-1.06354	5.1e-09
RNPC3	uc010oul.1,uc010oum.1,uc010oun.2	-1.06281	6.59e-11
SUZ12	uc002hgs.2,uc002hgt.2	-1.0628	6.22e-09
COL12A1	uc003phs.3,uc003pht.3,uc003phu.1,uc021zbv.1,uc021zbw.1	-1.06204	1.7e-07
ZNF83	uc002pzu.4,uc002pzv.4,uc010eps.3,uc010ept.3,uc010epu.3,uc010epv.3,uc010epw.3,uc010epx.3,uc010epy.3,uc010epz.3,uc010eqb.2,uc021uyx.1	-1.06195	3.19e-06
MIER3	uc003jqz.1,uc003jra.1,uc003jrb.1,uc003jrc.1,uc003jrd.1,uc003jre.3,uc003jrf.3,uc003jrg.3	-1.06176	4.03e-06
CCDC169	uc001uvl.4,uc010abm.3,uc010abn.3,uc010abo.3,uc010tej.2,uc010tek.2,uc010tel.2,uc010tem.2	-1.0617	0.0010972
ANTXR2	uc003hlx.1,uc003hly.4,uc003hlz.4,uc010ijn.3	-1.06115	3.88e-18
FAM134B	uc003jfr.3,uc003jfs.3	-1.06106	1.87e-10
STEAP1	uc003ujx.3,uc010lem.3	-1.06104	2.86e-08
ANKRD36B	uc002sxx.1,uc010fid.1,uc010yvc.1,uc010yvd.1	-1.06091	1.43e-08
TEC	uc003gxz.3	-1.06071	8.11e-05
GCNT1	uc004akf.4,uc004akh.4,uc010mpf.3,uc010mpg.3,uc010mph.3,uc010mpi.3,uc022bif.1	-1.06011	5.89e-08
NPHP3	uc003epd.2,uc003epe.2,uc003epf.2	-1.05856	3.12e-10
ZNF529	uc002oeg.4,uc002oeh.4,uc002oej.3,uc010xth.2,uc010xti.2	-1.05805	1.23e-07
ROR1	uc001dbi.4	-1.05778	5e-11
C16orf52	uc002dkb.2,uc002dkd.2	-1.05733	1.74e-09
RHOU	uc001htf.3,uc021pkj.1	-1.0571	1.32e-05
CNTRL	uc004bkw.2,uc004bkx.1,uc004bky.1,uc004bkz.1,uc004bla.1,uc004blb.1,uc010mvo.1,uc010mvp.1	-1.05692	0.000349607
PPFIA4	uc001gyz.3,uc001gza.3,uc001gzb.1,uc001gzc.1,uc009xaj.3,uc010pqf.2	-1.05679	3.8e-09
ICAM1	uc002mnq.2,uc010xle.1	-1.05598	0.00513773
FAM200B	uc003gof.4,uc021xmj.1	-1.05519	2.02e-14
LOC100506023	uc001gix.1	-1.05347	0.00173933
TTK	uc003pjb.4,uc003pjc.3	-1.0533	8.99e-05
AK123889	uc003obd.1	-1.05308	1.21e-07
KIAA1430	uc003ixf.4,uc003ixg.3	-1.05277	2.97e-07
CENPJ	uc001upu.3	-1.05277	0.000141136
EML5	uc001xxd.3,uc001xxe.3,uc001xxf.3,uc001xxh.1,uc021ryf.1,uc021ryg.1	-1.05239	7.17e-06
HDX	uc004eek.2,uc004eel.2,uc011mqv.2	-1.05211	0.00729141
NBN	uc003yei.1,uc003yej.1,uc011lgb.1	-1.05206	7.98e-06
CTSF	uc001oip.3	-1.05083	4.93e-08
FAM126A	uc003svm.4,uc003svn.4,uc011jyr.1	-1.05063	8.98e-06
ZNF283	uc002oxp.4,uc002oxr.4	-1.05044	2.46e-07
KDELR3	uc003avu.3,uc003avv.3	-1.05011	0.000606484
DMXL1	uc003ksc.1,uc003ksd.2,uc003kse.1,uc010jcl.1,uc010jcm.1,uc021ycw.1	-1.04992	3.82e-12
THRB	uc003ccx.4,uc003ccy.4,uc003ccz.4,uc003cda.1,uc003cdc.3,uc003cdd.3,uc003cde.1,uc010hfe.3,uc021wuc.1,uc021wud.1	-1.0495	1.82e-19
PARP11	uc001qmk.1,uc001qml.2,uc001qmm.2,uc001qmn.2,uc009zef.2	-1.04941	6.94e-06
RPS6KC1	uc001hkd.3,uc001hke.3,uc009xdi.1,uc010ptr.2,uc010pts.2,uc010ptt.2,uc010ptu.2,uc010ptv.2	-1.04917	3.8e-07
AL833455	uc004bnb.1	-1.04904	1.3e-09
FGD4	uc001rkx.4,uc001rky.3,uc001rkz.3,uc001rla.3,uc001rlb.1,uc001rlc.3,uc010ske.2	-1.04866	2.25e-06
FHL2	uc002tct.3,uc002tcv.3,uc002tcw.3,uc002tcx.3,uc002tcy.3,uc002tcz.3,uc002tda.3,uc002tdb.3,uc002tdc.3,uc002tdd.3,uc002tde.1	-1.04788	1.25e-37
CPQ	uc003yhw.3,uc010mbe.2	-1.04755	0.00180292
SKIV2L2	uc003jpy.4,uc011cqi.2	-1.04727	2.16e-10
UBE2Q2	uc002bbg.2,uc002bbh.2,uc002bbi.2,uc010umn.1	-1.04709	6.26e-15
CEACAM1	uc002otv.3,uc002otw.3,uc002otx.3,uc002oty.3,uc002otz.3,uc002oua.3,uc002oub.3,uc002ouc.3,uc010eii.3,uc010eij.3,uc010eik.3	-1.04691	1.76e-11
ZNF195	uc001lxs.3,uc001lxt.3,uc001lxu.3,uc001lxv.3,uc009ydz.3,uc010qxr.2,uc021qck.1	-1.04643	6.71e-09
TMEM133	uc001pgf.3	-1.04591	0.00103361
FAM175A	uc003hou.2,uc003hov.2	-1.0451	0.00344578
SHC3	uc004aqf.2	-1.04483	0.000579433
CACNG8	uc002qcs.2	-1.04416	0.00476525
XRCC4	uc003kia.1,uc003kib.3,uc003kic.3,uc003kid.3,uc003kie.3,uc003kig.3	-1.04409	1.39e-07
ECHDC1	uc003qax.3,uc003qay.4,uc003qaz.4,uc010key.3,uc010kez.3	-1.04399	5.49e-13
PRPF39	uc001wvy.4,uc001wvz.4,uc001wwa.1,uc010and.3	-1.0439	4e-05
RNF219	uc001vkw.1,uc010afb.1	-1.04377	4.38e-05
TMEM30A	uc003phw.2,uc003phx.2	-1.04348	1.22e-09
DLX2	uc002uhn.3,uc010zdx.1	-1.04282	0.00186007
ZNF226	uc002oyn.3,uc002oyo.3,uc002oyp.3,uc002oyq.3,uc002oyr.3,uc002oys.3,uc002oyt.3,uc010ejg.3	-1.04272	6.94e-10
ZNF254	uc002nru.3,uc010xrk.2	-1.04271	0.000124653
CCDC138	uc002ten.1,uc002teo.1,uc002tep.1,uc010fjm.1	-1.04199	8.11e-05
BC050344	uc003dqo.3	-1.0417	1.19e-09
SLC26A2	uc003lrh.3	-1.04138	3.13e-31
DDX60	uc003iro.3,uc003irp.3	-1.0412	0.00208157
DPY19L4	uc003ygx.2,uc003ygy.3	-1.0411	1.44e-15
ZNF280C	uc004evm.3,uc010nrf.2	-1.04089	9.69e-05
AK098095	uc003vwb.1	-1.04058	2.24e-09
ZNF141	uc003fzz.2,uc003gaa.2,uc003gab.3	-1.0404	6.63e-08
ZNF33A	uc001izg.3,uc001izh.3,uc001izi.1,uc010qev.2,uc021ppe.1	-1.04001	4.67e-06
RAB27B	uc002lfr.3	-1.03982	1.17e-09
SPINK13	uc003lpc.3,uc010jgt.3	-1.03981	0.00753336
CCNT2	uc002tub.2,uc002tuc.2,uc002tud.2,uc010zbf.2	-1.03913	4.24e-06
SWT1	uc001grg.4,uc001grh.4	-1.03899	0.00202159
DDIT4L	uc003hvq.3	-1.0382	0.00072082
CLDN12	uc003ukp.3,uc003ukq.3,uc003ukr.3,uc003uks.3,uc010leq.3,uc022ahd.1	-1.0381	2.98e-07
AOX1	uc002uvx.3,uc010fsu.3,uc010zhf.2	-1.03785	4.89e-41
SLC30A4	uc001zvj.3	-1.03782	1.23e-08
C12orf55	uc001teq.2,uc001tes.3,uc009ztl.1	-1.03773	1e-09
TSPAN2	uc001eft.3,uc021osc.1	-1.03772	0.00219627
EXOC6	uc001kie.3,uc001kif.4,uc001kig.3,uc001kih.3,uc001kii.3,uc009xub.3,uc009xuc.3,uc010qnr.2	-1.03768	5.61e-07
GULP1	uc002uqc.4,uc002uqd.3,uc002uqf.3,uc002uqg.3,uc002uqh.1,uc010fru.3,uc010zfw.2	-1.03747	1.23e-07
RXFP1	uc003ipz.3,uc010iqj.2,uc010iqk.3,uc010iql.3,uc010iqm.3,uc010iqn.3,uc010iqo.3,uc011cja.2,uc011cjb.2,uc011cjc.2,uc011cjd.2,uc011cje.2,uc011cjf.2	-1.03685	2.55e-06
CEP128	uc001xux.2,uc001xuy.1,uc001xva.1,uc010ata.1	-1.03675	2.08e-09
TNFRSF21	uc003oyv.3	-1.03525	6.78e-09
TMEM106B	uc003ssh.3,uc011jxk.2	-1.03483	4.73e-06
TRIB2	uc002rbv.4,uc010yjp.2	-1.03412	1.46e-13
ZNF770	uc001ziw.3,uc021siy.1	-1.03372	7.4e-07
MRC2	uc010ddq.1	-1.03342	0.0010179
ZBTB38	uc003etw.3,uc003ety.3,uc010hun.3,uc010huo.3,uc010hup.3,uc021xes.1	-1.03339	2.92e-16
CEP350	uc001gnr.1,uc001gnt.3,uc001gnu.3,uc001gnv.3,uc001gnw.1,uc001gnx.1,uc009wxl.2	-1.03244	1.38e-05
YES1	uc002kky.3,uc002kkz.3	-1.03121	4.48e-06
RIOK2	uc003kmz.3,uc003kna.3	-1.03096	1.58e-06
LRRC34	uc003ffx.3,uc003ffy.3,uc003fga.4,uc021xhd.1	-1.03051	1.1e-05
RDX	uc001pks.3,uc001pkt.3,uc001pku.3,uc009yxx.1,uc009yxy.3,uc009yxz.3,uc009yya.3,uc010rwe.2	-1.02992	6e-09
AF339817	uc001vnl.3	-1.02967	0.000974358
MYO5A	uc002abx.3,uc002aby.2,uc002abz.1,uc002aca.1,uc002acb.1,uc002acc.1,uc010ugd.1,uc010uge.1	-1.02919	4.02e-26
LMAN1	uc002lhz.3,uc010xek.1	-1.02912	9.79e-08
NUAK1	uc001tlj.1	-1.02899	5.73e-06
MAP4K5	uc001wya.3,uc001wyb.3,uc001wyc.1,uc010anv.1	-1.02814	1.27e-11
TMEM67	uc003yga.4,uc010mat.1,uc010mau.3,uc010mav.3,uc010maw.2,uc011lgk.2,uc011lgl.2	-1.02739	7.44e-06
LOC100216546	uc003vcj.2	-1.02707	5.88e-07
RNF157	uc002jqz.3,uc002jra.3	-1.02665	0.00387347
BC037952	uc001zjy.3	-1.02651	0.000110588
USP25	uc002yjy.1,uc002yjz.1,uc010gla.1,uc011aby.1	-1.02634	2.39e-08
PHF20L1	uc003ytr.3,uc003ytt.3,uc003ytu.1,uc003ytv.3,uc010mdv.3,uc011lja.2	-1.0259	6.53e-08
LOC100132707	uc003wlo.3,uc011kvr.2	-1.025	0.00106817
F2R	uc003ken.4	-1.02493	0.0042569
AK024092	uc021svq.1	-1.02491	0.000481725
DNAJC2	uc003vbn.3,uc003vbo.3,uc003vbp.3,uc003vbq.1,uc003vbr.1,uc010lix.3	-1.02334	0.000247208
MGC45800	uc003ivc.2	-1.0233	1.93e-05
ZHX1	uc003yqe.3,uc003yqf.3,uc003yqg.3,uc010mdi.3,uc022bak.1	-1.02289	8.75e-06
ABCA5	uc002jib.2,uc002jic.2,uc002jid.2,uc002jie.2,uc002jif.2,uc002jig.2,uc002jih.2,uc010dfe.2	-1.02245	4.53e-06
GXYLT1	uc001rms.4,uc001rmt.4	-1.02223	8.15e-10
FANCM	uc001wwc.2,uc001wwd.4,uc001wwe.4,uc010anf.3,uc010ang.3	-1.0221	0.000753114
MAP7D3	uc004ezs.3,uc004ezt.3,uc010nsa.2,uc011mwc.2	-1.02159	5.38e-16
ATG4C	uc001dat.3,uc001dau.3	-1.02077	5.11e-08
GOLIM4	uc003ffe.2,uc011bpe.1,uc011bpf.1,uc011bpg.1	-1.02029	8.39e-08
ZNF326	uc001dnp.4,uc001dnq.2,uc001dnr.2,uc009wda.1	-1.01996	4.19e-09
RBM25	uc001xnn.4,uc001xno.3,uc001xnp.3,uc010ttu.2	-1.01974	1.73e-06
ZNF281	uc001gve.3,uc001gvf.1,uc001gvg.1,uc021phb.1	-1.01928	1.5e-09
CYP4V2	uc003iyw.4,uc010ism.3	-1.01908	0.000283945
ZNF841	uc002pyl.1,uc010ydh.1	-1.01852	8.08e-05
PYROXD2	uc001kpb.3,uc001kpc.3,uc010qpe.2	-1.01806	2.17e-05
PPIP5K2	uc010jbo.2	-1.01712	0.000461572
CAPZA2	uc003vik.1,uc003vil.3,uc011knk.2	-1.01681	3.01e-06
SPATA6	uc001crr.2,uc001crs.2,uc010omv.2	-1.01594	0.000221039
ABHD13	uc001vqq.3,uc021rml.1	-1.01511	8.53e-07
PJA2	uc003kos.4	-1.01509	2.17e-05
ZNF600	uc002qab.4,uc021uyz.1	-1.01388	3.32e-05
ERCC6-PGBD3	uc001jhu.3	-1.01374	6.82e-23
ZNF461	uc002oem.3,uc002oen.3,uc010xtj.2	-1.01367	0.00172762
CEP135	uc010igz.1	-1.01312	0.00725176
AK097143	uc003qit.1	-1.01299	1.05e-05
ZNF761	uc002qbr.2,uc002qbt.2,uc010eqp.3,uc010ydy.2	-1.01293	3.68e-10
MUC21	uc003nsh.2,uc003nsi.1,uc021yuf.1	-1.01275	0.00929109
TAB3	uc004dcj.3,uc004dck.3,uc010ngl.3	-1.0125	2.3e-10
SNX18	uc003jpi.4,uc003jpj.4,uc011cqg.2	-1.0122	3.6e-09
MYBL1	uc003xwj.3,uc003xwk.3,uc003xwl.3	-1.01198	0.000285786
SLC8A1	uc002rrx.3,uc002rry.3,uc002rrz.3,uc002rsa.3,uc002rsb.2,uc002rsc.1,uc002rsd.4,uc010fan.1	-1.0114	1.05e-05
IDUA	uc003gby.3,uc003gbz.3,uc003gca.3	-1.01002	0.000854827
EDA2R	uc004dwq.3,uc004dwr.3,uc004dws.3,uc004dwt.2,uc011mpb.2,uc011mpc.2,uc022byh.1	-1.00946	1.4e-10
C7orf60	uc003vgo.1,uc011kms.1	-1.00813	6.52e-08
MICU2	uc001uof.3,uc010tct.2	-1.00794	0.000102877
MKLN1	uc003vqs.3,uc003vqu.3,uc010lmh.2,uc011kpl.2,uc011kpm.2	-1.00719	5.48e-06
HIST1H2BC	uc003ngk.4,uc003ngl.3	-1.00675	0.00791239
SENP6	uc003pic.2,uc003pid.4,uc003pie.4,uc003pif.1,uc010kbf.3	-1.00631	4.07e-05
LPAR6	uc001vcc.1,uc001vce.3,uc001vcf.3,uc010acu.3	-1.00614	1.47e-07
SH3BGRL2	uc003piz.1	-1.00512	0.00990875
UFM1	uc001uwu.3,uc010abz.2,uc010aca.2	-1.00419	1.66e-07
ZBTB33	uc004esn.1,uc010nqm.1,uc022cdm.1	-1.00363	3.06e-05
AK124970	uc001hog.1	-1.00324	0.000503575
SECISBP2L	uc001zxd.2,uc001zxe.2,uc010bep.2,uc010beq.2	-1.00152	1.09e-07
EPB41L5	uc002tmg.3,uc002tmh.4,uc010flk.3,uc010fll.3,uc010flm.3	-1.00094	3.44e-06
TWISTNB	uc003sup.1	-1.00062	4.88e-07
SLC30A9	uc003gwl.3,uc011byx.2	-1.00048	5.34e-07
AK057596	uc002sux.1	-1.00029	0.000538995
RPP21	uc003nqd.2,uc003nqe.2,uc003nqf.2,uc021yuc.1	1.00023	8.72e-14
DBNDD2	uc002xnz.3,uc002xoa.3,uc002xob.3,uc002xoc.3,uc002xod.3,uc002xof.3,uc002xog.3,uc021wei.1,uc021wej.1	1.0018	1.42e-12
9-Mar	uc001spx.2,uc001spy.3	1.00612	2.18e-06
SEMA4B	uc002boy.3,uc002boz.3,uc002bpa.3,uc010uqd.2	1.00709	2.88e-09
F12	uc003mgo.4	1.00928	3.4e-15
VWA1	uc001afr.3,uc001afs.3	1.00939	0.000219961
DCXR	uc002kdg.3,uc021ufk.1	1.01379	3.12e-13
ADAP1	uc003sjm.4,uc003sjn.4,uc003sjo.4,uc010ksc.3,uc011jvs.2	1.01672	3.61e-20
GDPD3	uc002dwp.3,uc002dwq.3	1.01702	8.08e-19
ADORA1	uc001gze.1,uc001gzf.1,uc009xak.1,uc010pqg.1,uc010pqh.1	1.01794	0.00114964
KLHDC7A	uc001bax.3,uc009vpg.3	1.02487	0.00226213
PLEKHG6	uc001qnr.3,uc001qns.3,uc010sew.2,uc010sex.2	1.03051	1.15e-05
ZNF34	uc003zdx.4,uc003zdy.4,uc010mgb.3	1.03082	4.01e-07
ID3	uc001bhh.4	1.03358	1.23e-13
PPAP2C	uc002loh.3,uc002loi.3,uc002loj.3	1.0336	1.52e-09
POLDIP3	uc003bcu.3,uc003bcv.3,uc010gza.3,uc011app.2,uc011apq.2,uc011apr.2	1.03555	9.06e-51
TRIM7	uc003mmv.1,uc003mmw.1,uc003mmx.1,uc003mmy.1,uc003mmz.1,uc003mna.2	1.03631	6.41e-12
MYLIP	uc003nbq.3,uc003nbr.3	1.03641	3.27e-06
RAPGEFL1	uc010cwu.1,uc010wfd.1	1.03675	9.76e-23
TRIM47	uc002jpv.3,uc002jpw.3	1.03715	8.19e-23
RORC	uc001ezg.3,uc001ezh.3,uc010pdo.2,uc010pdp.2	1.04209	0.00190056
DISP2	uc001zlk.1	1.04244	0.000334113
FKSG40	uc001ksu.3	1.04319	0.000278769
CYC1	uc003zay.3,uc003zaz.4	1.04601	3.24e-14
KRT8	uc001sbd.2,uc009zmk.1	1.04775	1.2e-16
C1orf172	uc001bni.2	1.04986	2.81e-08
SMARCD2	uc010dea.1,uc010deb.1,uc010wpt.1	1.05074	3.42e-20
PCYT2	uc002kce.2,uc002kcf.2,uc002kch.2,uc002kci.2,uc010wvb.2,uc010wvc.2	1.05292	2.5e-24
CYSTM1	uc003lfd.3,uc010jfi.3	1.05329	1.43e-23
NOX5	uc002arp.2,uc002arq.2,uc002arr.2,uc002ars.2,uc010bid.2,uc010bie.2,uc010bif.2	1.05334	1.32e-08
NARFL	uc002cjp.3,uc002cjr.3,uc010brc.1,uc010uuq.1,uc010uur.1,uc021tab.1	1.05569	3.78e-14
ABHD14A-ACY1	uc011bea.2	1.05885	2.6e-07
SH3BP1	uc003atg.1,uc003ath.1,uc003ati.3,uc003atj.1,uc003atk.1,uc011anl.1	1.06069	1.06e-11
FAM195A	uc002cic.1,uc002cid.1,uc021szz.1	1.06245	8.72e-42
ACOX2	uc003dkl.3	1.06481	2.16e-05
FAM46B	uc010ofj.2	1.06715	2.06e-11
MRPL11	uc001ohy.4,uc001ohz.4,uc001oia.4	1.06917	3e-30
PIM3	uc003bjb.3,uc011arj.2	1.06994	6.13e-22
LIPE	uc002otr.3,uc002ots.1	1.07437	1.97e-10
TPRN	uc004clt.3,uc004clu.3	1.07508	2e-08
CAMSAP3	uc002mgu.4,uc002mgv.4,uc002mgw.3	1.07708	9.94e-08
DTX4	uc001nnr.2,uc001nns.2	1.07727	6.96e-17
PDE1C	uc003tcm.2,uc003tcn.1,uc003tco.2,uc003tcr.3,uc003tcs.3	1.07771	5.58e-19
GUCA1B	uc003orz.3	1.07834	2.02e-05
PPARGC1B	uc003lrb.2,uc003lrc.3,uc003lrd.3,uc003lre.1,uc003lrf.3,uc021yfr.1	1.07868	2.68e-45
RAC3	uc002kdf.3	1.07899	8.62e-32
CHCHD10	uc002zxw.3	1.08464	6.91e-52
ZBTB7C	uc002ldb.3,uc010dnu.3,uc010dnv.3,uc010dnw.3,uc010dnx.1,uc010dny.1,uc010dnz.1,uc010doa.1,uc010dob.1,uc010doc.1,uc010dod.1,uc010doe.1,uc010dof.1,uc010dog.1,uc010doh.1,uc010doi.1,uc010doj.1,uc010dok.1,uc010dol.1,uc010dom.1,uc010don.1,uc010doo.1,uc010dop.1,uc010doq.1,uc010dor.1,uc010dos.1,uc010dot.1,uc010dou.1	1.08618	3.96e-06
CLIC3	uc004ckj.1	1.08795	6.65e-13
PTCH1	uc004avk.4,uc004avl.4,uc004avm.4,uc004avo.2,uc010mrn.3,uc010mro.3,uc010mrp.3,uc010mrq.3,uc010mrr.3,uc010mrs.1,uc010mrt.1,uc010mru.1,uc010mrv.1,uc010mrw.1	1.08827	7.32e-06
MVD	uc002flf.1,uc002flg.1	1.09048	2.31e-56
RSPO2	uc003ymq.3,uc003ymr.3,uc003yms.3	1.0952	0.000952352
ASNS	uc003uot.4,uc003uou.4,uc003uov.4,uc003uox.4,uc011kin.2,uc011kio.2	1.0976	7.14e-30
ECSIT	uc002msb.3,uc010dyc.2,uc010dyd.3,uc010xma.2	1.09952	1.45e-12
CBS	uc002zcs.1,uc002zct.2,uc002zcu.2,uc002zcv.2,uc002zcw.3	1.10237	6.72e-05
SLC28A1	uc002blf.3,uc002blg.3,uc010bnb.3,uc010upd.1,uc010upe.2,uc010upf.1,uc010upg.1	1.10398	0.00657871
METTL7A	uc001rxb.3,uc010smv.1	1.10424	2.29e-51
SP6	uc002imh.1,uc021tzc.1	1.1047	4e-14
ITPK1	uc001ybe.2,uc001ybf.3,uc001ybg.3,uc001ybh.3	1.10622	4.33e-33
MKNK2	uc002luq.1,uc002lur.2,uc002lus.2,uc002lut.1,uc010xgu.1,uc010xgv.1	1.10913	2.5e-24
SLC52A3	uc002wed.4,uc002wee.2	1.11319	1.22e-06
TFEB	uc003oqs.1,uc003oqv.1,uc003oqw.1,uc003oqy.1,uc003oqz.1,uc010jxo.1,uc010jxp.1,uc010jxq.1,uc021yzl.1	1.11818	4.15e-11
DEFB1	uc003wqs.2	1.11887	5.88e-21
FASN	uc002kdu.3,uc002kdv.1,uc002kdw.1	1.12029	1.23e-20
PCDH1	uc003llp.3,uc003llq.3,uc011dbf.2	1.12199	1.86e-11
AP1M2	uc002mpc.3,uc002mpd.3	1.12348	6.18e-26
NR1I3	uc001fzf.3,uc001fzg.3,uc001fzh.3,uc001fzi.3,uc001fzj.3,uc001fzk.3,uc001fzl.3,uc001fzm.3,uc001fzn.3,uc001fzo.3,uc001fzp.3,uc001fzq.3,uc001fzr.3,uc001fzs.3,uc001fzt.3,uc001fzu.3,uc001fzv.3,uc001fzw.3,uc001fzx.3,uc001fzy.3,uc001fzz.3,uc001gaa.3,uc001gab.3,uc001gac.3,uc009wug.3,uc010pkm.2,uc010pkn.1,uc021pbw.1	1.13026	0.00866541
TSPAN15	uc001jpo.1	1.13129	3.06e-09
RRAD	uc002eqn.2,uc002eqo.2	1.13601	0.00086052
RTN4R	uc002zru.3,uc002zrv.3	1.13849	4.44e-09
SLC16A13	uc002geh.3	1.13875	1.7e-08
ADARB2	uc001igj.2,uc001igl.4,uc001igm.4,uc009xhq.3	1.13913	1.19e-07
ECI1	uc002cpr.3,uc002cps.3	1.14218	2.97e-26
DAB2IP	uc004bln.3,uc004blo.3,uc004blp.3	1.14539	1.01e-21
AZGP1	uc003ush.3	1.1481	3.46e-32
CHURC1-FNTB	uc001xid.3,uc010tsj.2,uc010tsk.2,uc010tsl.2,uc010tsm.2,uc010tso.2	1.15324	5.81e-06
A4GALT	uc003bdb.3,uc010gzd.3,uc021wqo.1,uc021wqp.1,uc021wqq.1,uc021wqr.1	1.15407	1.09e-18
FAM155B	uc004dxk.3	1.15452	2.1e-18
PRR5-ARHGAP8	uc003bfd.3,uc003bfg.1,uc011aqi.2,uc011aqj.2	1.15777	4.4e-06
ACSF2	uc002iqu.2,uc010dbt.1,uc010wml.1,uc010wmm.1,uc010wmn.1,uc010wmo.1	1.16216	2.06e-13
LOC100506343	uc001ebq.1,uc021ort.1	1.16529	0.000838302
PRR15L	uc021tzd.1	1.16605	3.38e-08
RGS3	uc004bhu.3,uc004bhy.1	1.1687	4.92e-26
CD82	uc001myc.3,uc001myd.3	1.16897	3.9e-13
AX747021	uc002gtc.1	1.17111	0.000827406
LSP1	uc001lui.3,uc001luj.3,uc001luk.3,uc001lul.3,uc001lum.3	1.17247	7.51e-10
MGP	uc001rcn.2,uc021qvr.1	1.17254	1.2e-08
MNX1	uc003wna.3,uc003wnc.1,uc003wnd.1,uc022aqk.1	1.17516	0.0022327
CHDH	uc003dgz.3	1.17667	3.02e-16
HES7	uc002gkb.2,uc002gkc.3	1.18026	8.65e-11
CYP4F12	uc002nbl.3,uc010xoo.2,uc010xop.2	1.18146	4.58e-15
AX795351	uc002hdf.3	1.18159	0.000480952
ERBB3	uc001sjg.3,uc001sjh.3,uc001sji.3,uc001sjj.1,uc001sjk.3,uc001sjl.3,uc009zoj.3,uc009zok.3,uc010sqb.2,uc010sqc.2	1.18305	7.26e-24
PITX1	uc010jea.3	1.18563	4.21e-23
KCNIP3	uc002suo.1,uc002sup.3,uc002suq.3	1.19177	5.53e-21
HM587422	uc021tay.1	1.1936	0.00039304
MVK	uc001toy.4,uc001toz.4,uc001tpc.4,uc009zvk.3,uc010sxr.2,uc021rdo.1	1.19416	4.21e-23
RASSF5	uc001hec.1,uc001hed.3,uc001hee.3,uc001hef.3,uc001heg.1,uc021pie.1	1.19784	2.03e-10
CD2	uc001egu.4,uc010owz.1,uc010oxa.1	1.2101	0.00702719
SAPCD2	uc011men.2	1.21336	4.47e-74
MAPK4	uc002lev.3,uc010doz.3,uc010xdm.2	1.21471	3.19e-18
TGM1	uc001wod.3,uc010tog.2,uc021rrn.1	1.21589	1.17e-19
RAB11FIP4	uc002hgn.1,uc002hgo.2	1.22564	2.18e-11
UNC5B	uc001jro.3,uc001jrp.3	1.23141	1.85e-14
GRB7	uc002hsr.3,uc002hss.3,uc002hst.3,uc010cwc.3,uc021twu.1	1.23268	8.04e-06
EPN3	uc002ira.4,uc010wms.2,uc010wmt.2,uc010wmu.2	1.23428	2.52e-06
GPRC5C	uc002jkp.3,uc002jkq.3,uc002jkr.3,uc002jkt.3,uc002jku.3	1.23446	2.45e-06
PRKCQ-AS1	uc001ijl.3,uc021pmt.1	1.23862	0.00203953
SNAI1	uc002xuz.3	1.24082	1.53e-09
TSC22D3	uc004enf.3,uc004eng.3,uc004enh.3,uc004eni.3,uc004enj.3	1.24309	1.73e-14
CASP14	uc010dzv.2	1.2473	5.56e-11
ACSS2	uc002xbc.2,uc002xbd.2,uc002xbe.2,uc010gey.2,uc010zum.1	1.24878	2.28e-11
SYNE4	uc002ocq.1,uc002ocr.1,uc002ocs.1,uc010een.1,uc021utd.1	1.25007	9.63e-12
EFHD1	uc002vtc.3,uc002vtd.3,uc010fyf.3	1.25088	0.00814557
CYP27B1	uc001spz.1,uc001sqa.1,uc001sqb.1,uc001sqc.1,uc021qzp.1	1.25235	1.5e-19
TMEM92	uc002iqn.2,uc021tzz.1	1.25386	4.74e-16
C6orf52	uc003mzf.4,uc011dij.2,uc011dik.2,uc011dil.2	1.25661	0.000593246
GRAMD2	uc002atq.3,uc010bis.2,uc010ukh.2	1.26634	3.3e-22
CDKN1C	uc001lwr.4,uc001lws.4,uc001lwu.4,uc009ydr.3	1.26751	6.73e-12
PTGIS	uc002xut.3,uc010zyi.2	1.27683	9.73e-05
LHX1	uc002hnh.2,uc010cux.1	1.289	0.00546898
TSPAN18	uc001mye.4,uc001myg.3	1.29537	4.96e-08
EPHB3	uc003foz.3	1.29646	3.93e-07
LEMD1	uc001hci.2,uc001hcj.2,uc001hck.2,uc001hcl.2,uc001hcm.2,uc001hcn.2	1.30382	0.00192516
SUSD2	uc002zzn.1	1.30392	3.08e-13
CHD5	uc001alz.2,uc001ama.2,uc001amb.2,uc001amc.1	1.30416	0.00567339
TACC2	uc001lfv.3,uc001lfw.3,uc001lfx.3,uc001lfy.3,uc001lfz.3,uc001lga.3,uc001lgb.3,uc009xzx.3,uc009xzy.3,uc010qtv.2,uc010qtw.1	1.30513	1.54e-29
LRRK1	uc002bwq.1,uc002bwr.3,uc002bws.3,uc010usb.2,uc010usc.2	1.30864	5.46e-10
LPHN1	uc010xnn.2,uc010xno.2	1.31648	3.49e-52
KIF21B	uc001gvr.2,uc001gvs.2,uc001gvt.1,uc009wzl.2,uc010ppn.2	1.31757	3.43e-07
FAM212B	uc001ebo.2,uc001ebp.2	1.32287	4.38e-20
CD70	uc002mfi.3,uc010xjf.1	1.32688	1.03e-12
LPAR5	uc001qps.2,uc009zer.2,uc010sff.1,uc021qub.1	1.32982	1.88e-18
SLCO4A1	uc002ydb.1,uc002yde.1	1.33032	8.28e-15
AK126532	uc002mbg.1	1.34143	0.00426698
LLGL2	uc002jog.1,uc002joh.3,uc002joi.3,uc002joj.3,uc010dgf.1,uc010dgg.2,uc010wsd.2	1.35989	7.98e-40
CHST6	uc002fef.3,uc002feg.1,uc002feh.1,uc021tlj.1	1.36085	1.14e-05
GCAT	uc003atz.3,uc003aua.2	1.36369	2.96e-19
DHRS13	uc002hdd.4,uc002hde.4,uc010wba.2	1.37317	1.75e-09
SPEF1	uc002wjj.3	1.39026	0.00259277
UBXN10	uc001bdb.3,uc021oia.1	1.41111	0.00258721
SREBF1	uc002grp.2,uc002grq.2,uc002grr.2,uc002grs.2,uc002grt.2,uc002gru.2,uc010cpp.1,uc010cpq.1	1.41237	1.57e-23
RNF31	uc001wml.1,uc001wmm.1,uc001wmn.1,uc001wmo.1,uc001wmp.3,uc010alg.1,uc010alh.1	1.42912	2.51e-44
KRTCAP3	uc002rks.3,uc002rkt.3,uc010ylr.2,uc021vfd.1	1.43304	1.97e-23
LOC113230	uc002mxz.3	1.45429	0.000226443
CYP4F3	uc002nbj.3,uc002nbk.3,uc010xok.2,uc010xol.2,uc010xom.2,uc010xon.2	1.45822	1.56e-19
MACROD1	uc001nyh.3	1.45893	1.8e-18
FGFBP1	uc003gom.3,uc021xml.1	1.48066	3.56e-110
TRIM39-RPP21	uc010jsa.2	1.48896	0.000766297
PPP1R16B	uc002xje.3,uc010ggb.1,uc010ggc.3	1.49094	1.84e-21
REC8	uc001wmr.3,uc001wms.3	1.51527	4.72e-05
RAD51L3-RFFL	uc002hiq.2	1.51833	0.000612984
PPP1R1B	uc002hrz.3,uc002hsb.3,uc002hsc.3,uc010cvx.3	1.56193	0.000735216
TRIB3	uc002wdm.3,uc002wdn.3	1.57023	1.39e-19
H19	uc001lva.4,uc021qby.1,uc021qbz.1	1.57788	9.45e-13
HLA-DOB	uc003oca.3,uc011dqg.1	1.6081	3.42e-05
PLLP	uc002elg.2	1.62721	1.1e-05
TCEA3	uc009vqm.2,uc010ody.1,uc021oig.1,uc021oih.1	1.64816	0.000144225
ARHGEF16	uc001akg.4,uc001aki.3,uc001akj.3,uc009vli.1,uc010nzh.2	1.64838	7.22e-59
SERPINA3	uc001ydo.4,uc001ydp.3,uc001ydr.3,uc001yds.3,uc010avf.1,uc010avg.3	1.64964	3.87e-12
SCD	uc001kqy.3	1.65139	1.14e-60
IRF9	uc001wmq.3,uc010alj.3	1.72929	0.000147621
LINC00592	uc010snp.2	1.73327	5.79e-05
ADORA2A	uc002zzx.3,uc002zzy.4,uc003aab.3,uc010guo.1,uc010gup.3,uc010guq.3,uc011ajs.2,uc021wng.1	1.7576	0.000135752
AF289551	uc002jok.3	1.75932	1.16e-50
CPAMD8	uc002nfb.3,uc002nfd.1	1.8015	3.83e-11
KIAA1683	uc002nin.2,uc010ebn.2,uc010xqe.1,uc010xqf.1	1.80716	7.81e-13
KCNK5	uc003oon.3	1.82822	1.57e-58
LRRC36	uc002esv.3,uc002esw.3,uc002esx.3,uc010ceh.3,uc010vjk.2	1.86323	1.23e-08
CXCR4	uc002tuy.3,uc002tuz.3,uc010fnk.3	1.88757	1.16e-14
CYLC2	uc004bbs.2	1.94515	1.56e-05
STAC2	uc002hrs.3,uc010cvt.3	1.95149	5.53e-24
CD164L2	uc001boc.3	1.96744	8.43e-11
WFDC2	uc002xoo.3,uc002xop.3,uc002xoq.3,uc002xor.3	2.28509	3.82e-124
AL953854.2-002	uc004adu.3,uc004ady.3	2.40621	1.11e-07
ETNK2	uc001han.4,uc001hao.4,uc010pqr.2,uc010pqs.2,uc010pqt.2	2.70522	1.91e-55
