# Supplementary material for: SMARCA4 regulates gene expression and higher-order chromatin structure in proliferating mammary epithelial cells
Source: HighWire-hosted journal article supplement (doi:10.1101/gr.201624.115), 2016-07-19
Supplement: Supplemental_Table_S2.xlsx [file Supplemental_Table_S2.xlsx]

## Sheet: Up_and_Downregulated_lncRNAs
gene_id	Downregulated lncRNA gene	ShSMARCA4 /shSCRAM log2(fold_change)	p_value	locus			gene	Upregulated lncRNA gene	ShSMARCA4 /shSCRAM log2(fold_change)	p_value	locus
ENSG00000249867.1	RP11-115J23.1	-9.60161	0.0008	chr11:28724161-29085368			ENSG00000249007.1	RP11-510N19.5	1.00295	5e-05	chr1:201980497-201984785
ENSG00000254366.2	RP11-38H17.1	-9.33692	5e-05	chr8:78311307-78449526			ENSG00000254501.1	AP003068.9	1.00715	5e-05	chr11:64878185-64879167
ENSG00000223685.1	LINC00571	-7.9257	0.0019	chr13:38624953-38717369			ENSG00000257622.1	RP11-44N21.4	1.01248	0.0015	chr14:105618530-105647531
ENSG00000236591.1	RP11-162J8.3	-7.90699	0.0019	chr6:149348835-149353709			ENSG00000261005.1	CTB-58E17.1	1.01995	0.00065	chr17:36858704-36862514
ENSG00000257642.1	RP11-474B16.1	-6.27984	5e-05	chr12:105698644-105720795			ENSG00000263126.1	CTC-479C5.10	1.02228	5e-05	chr16:67916363-67920270
ENSG00000230408.3	AC007163.6	-4.14467	0.00025	chr2:201645217-201676893			ENSG00000272945.1	CTD-3216D2.5	1.04792	5e-05	chr20:32869437-32874272
ENSG00000247809.3	NR2F2-AS1	-4.02506	0.0001	chr15:96670597-96870590			ENSG00000204860.4	FAM201A	1.05193	5e-05	chr9:38620470-38624987
ENSG00000240373.1	SEC62-AS1	-3.95328	5e-05	chr3:169696323-169703503			ENSG00000175701.6	LINC00116	1.07332	5e-05	chr2:110969105-111043433
ENSG00000265845.2	RP11-20B24.5	-3.5645	0.00075	chr17:27253292-27271767			ENSG00000255135.3	RP11-111M22.3	1.07344	5e-05	chr11:76152381-76155700
ENSG00000177757.1	FAM87B	-3.46364	0.00485	chr1:745488-755214			ENSG00000255857.1	PXN-AS1	1.07959	0.0002	chr12:120639093-120650941
ENSG00000226711.2	FAM66C	-3.00722	0.00455	chr12:8332804-8368747			ENSG00000254682.1	RP11-660L16.2	1.0859	0.0006	chr11:71159719-71163203
ENSG00000237499.2	RP11-356I2.4	-3.00666	0.00255	chr6:138144809-138189370			ENSG00000255050.1	RP11-661A12.9	1.08687	5e-05	chr8:144655659-144659567
ENSG00000248690.2	HAS2-AS1	-2.82398	5e-05	chr8:122651532-122656933			ENSG00000261705.1	RP11-61A14.2	1.09675	5e-05	chr16:66921917-66922834
ENSG00000227292.1	AC009229.5	-2.75579	0.0003	chr2:38430504-38466732			ENSG00000259952.1	AC009133.15	1.10354	5e-05	chr16:29817816-29819053
ENSG00000272327.1	RP11-1002K11.1	-2.70752	0.0042	chr8:32623642-32625477			ENSG00000258634.2	RP4-773N10.4	1.11455	5e-05	chr1:110600961-110605177
ENSG00000240476.1	LINC00973	-2.32716	0.0046	chr3:98621267-98737406			ENSG00000261088.1	RP11-61A14.3	1.13313	5e-05	chr16:66923071-66924996
ENSG00000248698.1	LINC01085	-2.30004	0.0001	chr4:14113591-14145216			ENSG00000232098.2	CTD-2619J13.14	1.13514	0.00385	chr19:58915604-58919851
ENSG00000241288.3	RP11-379B18.5	-2.27156	0.0049	chr3:125546080-125607918			ENSG00000267801.1	RP11-552F3.9	1.13707	0.0037	chr17:73872452-73875627
ENSG00000250657.1	RP11-1E6.1	-2.24886	0.0001	chr4:43342891-43347617			ENSG00000235823.1	LINC00263	1.14222	5e-05	chr10:102133371-102143125
ENSG00000257219.1	RP11-54A9.1	-2.2355	0.0003	chr12:76653618-76698911			ENSG00000265778.1	RP11-17M16.2	1.15786	0.00375	chr18:74203607-74205487
ENSG00000223749.3	MIR503HG	-2.17683	0.00405	chrX:133677366-133680741			ENSG00000262152.2	LINC00514	1.16526	0.00515	chr16:3038961-3044510
ENSG00000232732.5	AC073043.1	-2.11399	0.0005	chr2:200732118-200775882			ENSG00000246582.2	RP11-1149O23.3	1.17177	5e-05	chr8:23081983-23088439
ENSG00000268001.1	CTC-241F20.3	-2.09213	5e-05	chr19:48758931-48761456			ENSG00000270168.1	LA16c-380H5.4	1.17237	5e-05	chr16:3051300-3052017
ENSG00000271270.1	TMCC1-AS1	-2.08214	0.0026	chr3:129612713-129637418			ENSG00000257815.1	RP11-611E13.2	1.17342	0.00545	chr12:70297812-70637140
ENSG00000248175.1	CTC-428G20.3	-2.02163	5e-05	chr5:114539712-114541943			ENSG00000272078.1	RP4-734G22.3	1.18266	5e-05	chr1:10699297-10714390
ENSG00000260966.1	RP11-690D19.3	-1.99411	5e-05	chr11:102921415-102926528			ENSG00000203499.6	FAM83H-AS1	1.18307	0.0005	chr8:144816309-144828507
ENSG00000223764.2	RP11-54O7.3	-1.95111	0.0022	chr1:852244-856396			ENSG00000267149.2	CTC-550B14.6	1.18485	0.00015	chr19:55517560-55565296
ENSG00000251442.1	RP11-792D21.2	-1.90194	0.00065	chr4:79567056-79603853			ENSG00000257524.1	RP11-203J24.9	1.1854	5e-05	chr9:130630142-130649066
ENSG00000259828.1	RP11-63E9.1	-1.88644	5e-05	chr6:141768147-141772143			ENSG00000232545.1	KB-318B8.7	1.19105	0.0055	chr22:24497651-24499317
ENSG00000272761.1	RP11-572C15.6	-1.84908	5e-05	chr3:112315640-112320749			ENSG00000259211.1	RP11-64K12.8	1.19657	0.0014	chr15:40756391-40758925
ENSG00000273038.1	RP11-479G22.8	-1.8093	5e-05	chr10:33176188-33178239			ENSG00000247240.3	UBL7-AS1	1.24117	0.0018	chr15:74753605-74773643
ENSG00000163364.5	AC017048.3	-1.79742	0.00055	chr2:177494316-177520686			ENSG00000224614.1	TNK2-AS1	1.25465	0.0013	chr3:195634946-195638128
ENSG00000261051.1	RP11-274H2.5	-1.79553	0.00175	chr3:145777371-145779466			ENSG00000214049.6	UCA1	1.25509	0.0007	chr19:15937854-15947130
ENSG00000152931.7	PART1	-1.77516	0.00055	chr5:59783539-59843484			ENSG00000267047.1	RP11-589P10.7	1.27255	0.00525	chr17:6888812-6922978
ENSG00000259716.1	RP5-977B1.11	-1.77497	0.0001	chr20:35136562-35232932			ENSG00000261663.1	RP11-304L19.11	1.28669	5e-05	chr16:2290487-2291819
ENSG00000261490.1	RP11-448G15.3	-1.77377	0.0003	chr4:10069712-10074643			ENSG00000261790.1	AC005606.14	1.28968	0.0024	chr16:2034877-2040358
ENSG00000233452.2	STXBP5-AS1	-1.75916	0.0036	chr6:147163036-147525750			ENSG00000265666.1	CTD-2267D19.2	1.31006	0.0016	chr17:38497118-38499388
ENSG00000258667.1	HIF1A-AS2	-1.7552	5e-05	chr14:62182275-62242978			ENSG00000267174.1	CTC-510F12.4	1.31316	5e-05	chr19:11411452-11435117
ENSG00000235079.1	ZRANB2-AS1	-1.74419	0.00535	chr1:71514537-71532867			ENSG00000259321.1	RP11-468E2.5	1.31551	0.00075	chr14:24608653-24609653
ENSG00000244479.2	OR2A1-AS1	-1.68745	0.003	chr7:143891950-144053274			ENSG00000203362.2	RP3-337H4.8	1.3303	0.00075	chr6:43555966-43559099
ENSG00000261771.1	DYX1C1-CCPG1	-1.68584	5e-05	chr15:55647445-55790558			ENSG00000260593.1	RP11-432I5.2	1.33694	0.00315	chr16:71657610-71660719
ENSG00000231290.1	APCDD1L-AS1	-1.68156	5e-05	chr20:57090434-57194944			ENSG00000272079.1	LA16c-380H5.5	1.34687	5e-05	chr16:3056120-3057386
ENSG00000241769.3	LINC00893	-1.68134	0.0031	chrX:148609129-148622504			ENSG00000256116.1	RP11-783K16.14	1.37006	0.0003	chr11:63996685-64001824
ENSG00000248323.1	LUCAT1	-1.63124	0.00025	chr5:90598845-90610219			ENSG00000256894.1	RP11-283G6.3	1.38129	0.0037	chr12:26278087-26279550
ENSG00000251562.3	MALAT1	-1.60121	5e-05	chr11:65265232-65273940			ENSG00000235027.1	AC068580.6	1.38728	5e-05	chr11:1781577-1783716
ENSG00000261326.2	RP5-1057J7.6	-1.58829	0.00035	chr1:23607801-23613245			ENSG00000261840.1	RP11-146F11.1	1.40296	0.0028	chr16:30709029-30710379
ENSG00000260604.1	RP1-140K8.5	-1.58452	5e-05	chr6:3905143-3912213			ENSG00000223837.2	BRD2-IT1	1.42214	0.00305	chr6:32938008-32938663
ENSG00000259279.1	CTD-2033D15.1	-1.57242	0.0004	chr15:39885780-39886432			ENSG00000261578.1	RP11-21L23.2	1.45136	5e-05	chr11:76511407-76515599
ENSG00000242147.1	RP13-463N16.6	-1.53161	0.00155	chr10:5636953-5638081			ENSG00000260401.1	RP11-800A3.4	1.46777	5e-05	chr11:72950019-72953380
ENSG00000271614.1	LINC00936	-1.48936	0.0016	chr12:90102735-90106367			ENSG00000235097.1	LINC00330	1.4835	0.0005	chr13:45373638-45383766
ENSG00000245532.4	NEAT1	-1.47919	5e-05	chr11:65190244-65213011			ENSG00000229891.1	Z83851.1	1.54195	0.00515	chr22:42760405-42765242
ENSG00000234084.1	RP3-388E23.2	-1.39856	0.00475	chr6:135622705-135628296			ENSG00000261938.1	RP11-461A8.1	1.54217	0.00385	chr16:3631181-3633267
ENSG00000272700.1	RP11-245C23.3	-1.38517	0.00115	chr3:178954478-178955163			ENSG00000214145.2	LINC00887	1.57274	0.00355	chr3:194014253-194030592
ENSG00000231574.1	RP11-91K9.1	-1.37225	0.0008	chr3:177534652-177617012			ENSG00000266642.1	RP11-20B24.4	1.65087	5e-05	chr17:27224755-27226412
ENSG00000267510.1	CTC-325H20.4	-1.35396	0.00315	chr19:9402190-9405158			ENSG00000261175.1	CTD-2015G9.2	1.75877	0.00165	chr16:86755696-86771432
ENSG00000261428.1	RP11-16P6.1	-1.34772	0.0036	chr2:223431623-223434438			ENSG00000237491.4	RP11-206L10.9	1.93109	0.00315	chr1:714149-745440
ENSG00000225135.1	RP11-361F15.2	-1.33795	5e-05	chr6:147708799-147711601			ENSG00000234222.2	RP11-315I20.1	1.95736	0.00125	chr1:145475981-145508503
ENSG00000260465.1	RP11-63M22.2	-1.33048	5e-05	chr16:66754799-66765688			ENSG00000130600.11	H19	1.98507	5e-05	chr11:2016405-2022700
ENSG00000273131.1	RP6-42F4.1	-1.32285	5e-05	chr1:120693319-120697146			ENSG00000157152.12	SYN2	2.66169	0.0051	chr3:12045875-12232900
ENSG00000118412.8	CASP8AP2	-1.29554	5e-05	chr6:90539612-90584155			ENSG00000258279.2	LINC00592	2.73137	0.00185	chr12:52604713-52617588
ENSG00000177853.10	ZNF518A	-1.28702	0.0003	chr10:97889471-97965044			ENSG00000261222.2	CTD-2006K23.1	2.76151	5e-05	chr17:72595978-72603368
ENSG00000272695.1	GAS6-AS2	-1.28672	0.00115	chr13:114567140-114569806			ENSG00000228350.1	RP11-148G20.1	3.07894	0.00365	chr3:48701208-48706607
ENSG00000259498.1	RP11-244F12.3	-1.2799	0.0003	chr15:63338232-63341586			ENSG00000232298.2	RP11-10N16.3	3.7453	5e-05	chr1:24634045-24648391
ENSG00000255125.1	RP11-685M7.5	-1.2668	0.00415	chr11:10804859-10823172			ENSG00000267151.2	MIR2117	4.34196	0.0011	chr17:41522074-41528568
ENSG00000257742.1	RP11-350F4.2	-1.24678	5e-05	chr12:44112795-44117803
ENSG00000270069.1	RP6-99M1.2	-1.24492	5e-05	chrX:45604638-45629677
ENSG00000260822.1	GS1-358P8.4	-1.23727	5e-05	chrX:24563632-24568583
ENSG00000224138.1	AC000123.4	-1.17438	0.00025	chr7:126990181-126991577
ENSG00000270641.1	TSIX	-1.16773	5e-05	chrX:73012039-73072588
ENSG00000272815.1	RP11-219A15.4	-1.16517	5e-05	chr17:16691370-16719854
ENSG00000272341.1	RP1-151F17.2	-1.16146	0.0023	chr6:16764576-16767114
ENSG00000271895.1	RP4-635E18.8	-1.15474	0.00105	chr1:11089715-11090585
ENSG00000258175.1	RP11-412H8.2	-1.14085	5e-05	chr14:29061428-29082829
ENSG00000251095.2	RP11-115D19.1	-1.13839	0.0038	chr4:90472506-90647654
ENSG00000243150.1	RP11-538P18.2	-1.13509	0.00145	chr3:158263008-158288855
ENSG00000259976.1	RP11-553L6.5	-1.11267	0.0032	chr3:114033347-114035026
ENSG00000229647.1	AC007879.7	-1.1006	0.0003	chr2:208104373-208394519
ENSG00000267163.1	AC084219.3	-1.09948	0.00095	chr19:44598502-44603864
ENSG00000186019.10	AC084219.4	-1.07365	5e-05	chr19:44609615-44617298
ENSG00000259380.1	RP11-346D14.1	-1.07147	5e-05	chr15:38431795-38519088
ENSG00000243701.1	LINC00883	-1.06263	5e-05	chr3:106959538-107101007
ENSG00000273142.1	RP11-458F8.4	-1.06065	5e-05	chr7:66367843-66371284
ENSG00000269941.1	RP5-1172N10.4	-1.05314	0.00115	chrX:41092885-41093536
ENSG00000231131.2	RP11-346D6.6	-1.05272	5e-05	chr10:54210633-54230293
ENSG00000232931.1	LINC00342	-1.03924	5e-05	chr2:96472865-96481963
ENSG00000255248.2	RP11-166D19.1	-1.01501	0.0008	chr11:121899062-121987031
ENSG00000243107.1	AC000120.7	-1.01397	0.00055	chr7:91829327-91836171
ENSG00000259820.1	AC083843.1	-1.01323	5e-05	chr8:135804262-135810515
