# Supplementary material for: SMARCA4 regulates gene expression and higher-order chromatin structure in proliferating mammary epithelial cells
Source: HighWire-hosted journal article supplement (doi:10.1101/gr.201624.115), 2016-07-19
Supplement: Supplemental_Table_S3.xlsx [file Supplemental_Table_S3.xlsx]

## Sheet: Sheet1
	MCF10A shSMARCA4 Rep1		MCF10A shSMARCA4 Rep2		MCF10A shSCRAM Rep1		MCF10A shSCRAM Rep2
	Number of Reads	Percentage	Number of Reads	Percentage	Number of Reads	Percentage	Number of Reads	Percentage
Mapping Statistics
side1TotalReads	126112222		139322117		68005545		129704939
side1NoMap	21517521	(17.06%)	22996481	(16.51%)	11500278	(16.91%)	22645804	(17.46%)
side1MultiMap	4087114	(3.24%)	4293707	(3.08%)	2830203	(4.16%)	3858068	(2.97%)
side1UniqueMap	100507587	(79.70%)	112031929	(80.41%)	53675064	(78.93%)	103201067	(79.57%)
side2TotalReads	126112222		139322117		68005545		129704939
side2NoMap	23200302	(18.40%)	25414327	(18.24%)	21318997	(31.35%)	29351593	(22.63%)
side2MultiMap	3910177	(3.10%)	4088474	(2.93%)	2066855	(3.04%)	3381613	(2.61%)
side2UniqueMap	99001743	(78.50%)	109819316	(78.82%)	44619693	(65.61%)	96971733	(74.76%)
Hi-C Library Quality Metrics
totalReads	126112222		139322117		68005545		129704939
unMapped	4625491	(3.67%)	4444297	(3.19%)	5700459	(8.38%)	5049870	(3.89%)
singleSided	43464132	(34.46%)	47904395	(34.38%)	26315415	(38.70%)	49137338	(37.88%)
bothSideMapped	78022599	(61.87%)	86973425	(62.43%)	35989671	(52.92%)	75517731	(58.22%)
sameFragment	8625171	(11.05%)	10540171	(12.12%)	7189949	(19.98%)	14374837	(19.04%)
selfCircle	4552732	(5.84%)	7430909	(8.54%)	1001252	(2.78%)	11074896	(14.67%)
danglingEnd	4033674	(5.17%)	3088729	(3.55%)	5888191	(16.36%)	3184759	(4.22%)
bounded	55362	(1.37%)	16988	(0.55%)	20229	(0.34%)	12640	(0.40%)
internal	3978312	(98.63%)	3071741	(99.45%)	5867962	(99.66%)	3172119	(99.60%)
error	38765	(0.05%)	20533	(0.02%)	300506	(0.83%)	115182	(0.15%)
validPair	69397428	(88.95%)	76433254	(87.88%)	28799722	(80.02%)	61142894	(80.96%)
cis	20629873	(29.73%)	11331458	(14.83%)	6632107	(23.03%)	8420921	(13.77%)
trans	48767555	(70.27%)	65101796	(85.17%)	22167615	(76.97%)	52721973	(86.23%)
Hi-C Library Redundancy Metrics
validPair	69397428	(100%)	76433254	(100%)	28799722	(100%)	61142894	(100%)
totalMolecules	69397428	(100%)	76433254	(100%)	28799722	(100%)	61142894	(100%)
redundantInteractions	27456057	(39.56%)	7727938	(10.11%)	12573823	(43.66%)	20639957	(33.76%)
nonRedundantInteractions	41941371	(60.44%)	68705316	(89.89%)	16225899	(56.34%)	40502937	(66.24%)
percentRedundant	39.56%		10.11%		43.66%		33.76%
